# Supplementary material for: Understanding the Combined Effects of High Glucose Induced Hyper-Osmotic Stress and Oxygen Tension in the Progression of Tumourigenesis: From Mechanism to Anti-Cancer Therapeutics
Source: MDPI journal article supplement (doi:10.3390/cells12060825), 2023-03-07
Supplement: s1 [file s1]

Archive with 2 entries (2 files):
- Additional File S1_Supplementary Table S1.xlsx
- Additional File S2 - Supplementary Methods and Figures.pdf
