# Supplementary material for: Understanding the Combined Effects of High Glucose Induced Hyper-Osmotic Stress and Oxygen Tension in the Progression of Tumourigenesis: From Mechanism to Anti-Cancer Therapeutics
Source: MDPI journal article supplement (doi:10.3390/cells12060825), 2023-03-07
Supplement: s1 [file s1 › Additional File S1_Supplementary Table S1.xlsx]

## Sheet: SUMOylated IDs
Table S1:Several 'hallmark' G2/M checkpoint and mitotic spindle proteins show evidence of being modified by SUMO2 isoforms in mass spectrometry data obtained from Hendriks et al., 2017 study
SUMO2 conjugated proteins are highlighted in green in the lists obtained from Eifler et al, 2015 and MsigDB data on mitosis regulatory proteins
A) Hedriks list of SUMO2 conjugated proteins obtained from proteomics study CITATION: Hendriks, Ivo A., et al. "Site-specific mapping of the human SUMO proteome reveals co-modification with phosphorylation." Nature structural & molecular biology 24.3 (2017): 325.			B) List of M phase transition proteins obtained from the following citation and matched with Hedriks list CITATION: Eifler, K., & Vertegaal, A. C. O. (2015). SUMOylation-Mediated Regulation of Cell Cycle Progression and Cancer. In Trends in Biochemical Sciences (Vol. 40, Issue 12, pp. 779–793). Elsevier BV. https://doi.org/10.1016/j.tibs.2015.09.006		C) List of proteins obtained from MSigDB database from https://www.gsea-msigdb.org/gsea/msigdb/collection_details.jsp CITATION: Liberzon A, Birger C, Thorvaldsdóttir H, Ghandi M, Mesirov JP, Tamayo P. The Molecular Signatures Database (MSigDB) hallmark gene set collection. Cell Syst. 2015 Dec 23;1(6):417-425. MSigDB Human Gene Set: HALLMARK_G2M_CHECKPOINT					D) List of proteins obtained from MSigDB database from https://www.gsea-msigdb.org/gsea/msigdb/collection_details.jsp CITATION: Liberzon A, Birger C, Thorvaldsdóttir H, Ghandi M, Mesirov JP, Tamayo P. The Molecular Signatures Database (MSigDB) hallmark gene set collection. Cell Syst. 2015 Dec 23;1(6):417-425. Human Gene Set: HALLMARK_MITOTIC_SPINDLE
Gene names	Protein names		Mitotic Proteins		Original Member	Gene ID (Entrez)	Gene Symbol	Description		Original Member	Gene ID (Entrez)	Gene Symbol	Description
SAFB2	Scaffold attachment factor B2		PLK1		ARID4A	5926	ARID4A	AT-rich interaction domain 4A		ALMS1	7840	ALMS1	ALMS1 centrosome and basal body associat...
ZNF281	Zinc finger protein 281		FOXM1		ATF5	22809	ATF5	activating transcription factor 5		ANLN	54443	ANLN	anillin actin binding protein
TRIM24	Transcription intermediary factor 1-alpha		CDK1		ATRX	546	ATRX	ATRX chromatin remodeler		ARAP3	64411	ARAP3	ArfGAP with RhoGAP domain, ankyrin repea...
RSF1	Remodeling and spacing factor 1		CCNB1		AURKA	6790	AURKA	aurora kinase A		ARHGAP10	79658	ARHGAP10	Rho GTPase activating protein 10
WIZ	Protein Wiz		AURKB		AURKB	9212	AURKB	aurora kinase B		ARHGAP29	9411	ARHGAP29	Rho GTPase activating protein 29
SART1	U4/U6.U5 tri-snRNP-associated protein 1		BUB1		BARD1	580	BARD1	BRCA1 associated RING domain 1		ARHGDIA	396	ARHGDIA	Rho GDP dissociation inhibitor alpha
ZNF644	Zinc finger protein 644		APC/C		BCL3	602	BCL3	BCL3 transcription coactivator		ARHGEF3	50650	ARHGEF3	Rho guanine nucleotide exchange factor 3...
ZNF106	Zinc finger protein 106		CDC20		BIRC5	332	BIRC5	baculoviral IAP repeat containing 5		ARHGEF7	8874	ARHGEF7	Rho guanine nucleotide exchange factor 7...
SNIP1	Smad nuclear-interacting protein 1		BUBR1		BRCA2	675	BRCA2	BRCA2 DNA repair associated		AURKA	6790	AURKA	aurora kinase A
TCF20	Transcription factor 20				BUB1	699	BUB1	BUB1 mitotic checkpoint serine/threonin...		BCAR1	9564	BCAR1	BCAR1 scaffold protein, Cas family membe...
ZMYM4	Zinc finger MYM-type protein 4				BUB3	9184	BUB3	BUB3 mitotic checkpoint protein		BIN1	274	BIN1	bridging integrator 1
SUMO2	Small ubiquitin-related modifier 2				CASP8AP2	9994	CASP8AP2	caspase 8 associated protein 2		BIRC5	332	BIRC5	baculoviral IAP repeat containing 5
MECOM	MDS1 and EVI1 complex locus protein EVI1				CBX1	10951	CBX1	chromobox 1		BRCA2	675	BRCA2	BRCA2 DNA repair associated
GTF2I	General transcription factor II-I				CCNA2	890	CCNA2	cyclin A2		BUB1	699	BUB1	BUB1 mitotic checkpoint serine/threonine...
TOP2A	DNA topoisomerase 2-alpha				CCND1	595	CCND1	cyclin D1		CD2AP	23607	CD2AP	CD2 associated protein
RERE	Arginine-glutamic acid dipeptide repeats protein				CCNF	899	CCNF	cyclin F		CDC27	996	CDC27	cell division cycle 27
MGA	MAX gene-associated protein				CCNT1	904	CCNT1	cyclin T1		CDC42BPA	8476	CDC42BPA	CDC42 binding protein kinase alpha
GTF2IRD1	General transcription factor II-I repeat domain-containing protein 1				CDC20	991	CDC20	cell division cycle 20		CDC42EP2	10435	CDC42EP2	CDC42 effector protein 2
TRIM33	E3 ubiquitin-protein ligase TRIM33				CDC25A	993	CDC25A	cell division cycle 25A		CDC42EP4	23580	CDC42EP4	CDC42 effector protein 4
ZNF280C	Zinc finger protein 280C				CDC25B	994	CDC25B	cell division cycle 25B		CDK5RAP2	55755	CDK5RAP2	CDK5 regulatory subunit associated prote...
RBM25	RNA-binding protein 25				CDC27	996	CDC27	cell division cycle 27		CEP250	11190	CEP250	centrosomal protein 250
TRIM28	Transcription intermediary factor 1-beta				CDC45	8318	CDC45	cell division cycle 45		CEP57	9702	CEP57	centrosomal protein 57
ZMYND8	Protein kinase C-binding protein 1				CDC6	990	CDC6	cell division cycle 6		CEP72	55722	CEP72	centrosomal protein 72
CHD4	Chromodomain-helicase-DNA-binding protein 4				CDC7	8317	CDC7	cell division cycle 7		CKAP5	9793	CKAP5	cytoskeleton associated protein 5
TRPS1	Zinc finger transcription factor Trps1				CDK4	1019	CDK4	cyclin dependent kinase 4		CNTRL	11064	CNTRL	centriolin
ZNF827	Zinc finger protein 827				CHAF1A	10036	CHAF1A	chromatin assembly factor 1 subunit A		CNTROB	116840	CNTROB	centrobin, centriole duplication and spi...
BCLAF1	Bcl-2-associated transcription factor 1				CHEK1	1111	CHEK1	checkpoint kinase 1		CTTN	2017	CTTN	cortactin
NFIL3	Nuclear factor interleukin-3-regulated protein				CKS1B	1163	CKS1B	CDC28 protein kinase regulatory subunit...		DLGAP5	9787	DLGAP5	DLG associated protein 5
NOP58	Nucleolar protein 58				CKS2	1164	CKS2	CDC28 protein kinase regulatory subunit...		DOCK2	1794	DOCK2	dedicator of cytokinesis 2
TOP1	DNA topoisomerase 1				CTCF	10664	CTCF	CCCTC-binding factor		DOCK4	9732	DOCK4	dedicator of cytokinesis 4
ZC3H14	Zinc finger CCCH domain-containing protein 14				CUL1	8454	CUL1	cullin 1		DST	667	DST	dystonin
MBD1	Methyl-CpG-binding domain protein 1				CUL3	8452	CUL3	cullin 3		DYNC1H1	1778	DYNC1H1	dynein cytoplasmic 1 heavy chain 1
PML	Protein PML				CUL4A	8451	CUL4A	cullin 4A		DYNLL2	140735	DYNLL2	dynein light chain LC8-type 2
SLX4	Structure-specific endonuclease subunit SLX4				DBF4	10926	DBF4	DBF4 zinc finger		ECT2	1894	ECT2	epithelial cell transforming 2
HNRNPM	Heterogeneous nuclear ribonucleoprotein M				DDX39A	10212	DDX39A	DExD-box helicase 39A		EPB41	2035	EPB41	erythrocyte membrane protein band 4.1
PPP1R10	Serine/threonine-protein phosphatase 1 regulatory subunit 10				DKC1	1736	DKC1	dyskerin pseudouridine synthase 1		EPB41L2	2037	EPB41L2	erythrocyte membrane protein band 4.1 li...
POLR3D	DNA-directed RNA polymerase III subunit RPC4				DR1	1810	DR1	down-regulator of transcription 1		ESPL1	9700	ESPL1	extra spindle pole bodies like 1, separa...
ZBTB1	Zinc finger and BTB domain-containing protein 1				E2F2	1870	E2F2	E2F transcription factor 2		EZR	7430	EZR	ezrin
RANGAP1	Ran GTPase-activating protein 1				EGF	1950	EGF	epidermal growth factor		FBXO5	26271	FBXO5	F-box protein 5
RNF111	E3 ubiquitin-protein ligase Arkadia				ESPL1	9700	ESPL1	extra spindle pole bodies like 1, separ...		FLNA	2316	FLNA	filamin A
ZBTB21	Zinc finger and BTB domain-containing protein 21				EXO1	9156	EXO1	exonuclease 1		FLNB	2317	FLNB	filamin B
MORC3	MORC family CW-type zinc finger protein 3				EZH2	2146	EZH2	enhancer of zeste 2 polycomb repressive...		FSCN1	6624	FSCN1	fascin actin-bundling protein 1
ZNF451	Zinc finger protein 451				FBXO5	26271	FBXO5	F-box protein 5		GSN	2934	GSN	gelsolin
CDK11B;CDC2L1	Cyclin-dependent kinase 11B				G3BP1	10146	G3BP1	G3BP stress granule assembly factor 1		INCENP	3619	INCENP	inner centromere protein
TOP2B	DNA topoisomerase 2-beta;DNA topoisomerase 2				GINS2	51659	GINS2	GINS complex subunit 2		KATNA1	11104	KATNA1	katanin catalytic subunit A1
FOSL2	Fos-related antigen 2				HIF1A	3091	HIF1A	hypoxia inducible factor 1 subunit alph...		KATNB1	10300	KATNB1	katanin regulatory subunit B1
YEATS2	YEATS domain-containing protein 2				HIRA	7290	HIRA	histone cell cycle regulator		KIF11	3832	KIF11	kinesin family member 11
RREB1	Ras-responsive element-binding protein 1				HMGA1	3159	HMGA1	high mobility group AT-hook 1		KIF15	56992	KIF15	kinesin family member 15
ZBTB38	Zinc finger and BTB domain-containing protein 38				HMGN2	3151	HMGN2	high mobility group nucleosomal binding...		KIF1B	23095	KIF1B	kinesin family member 1B
SUMO3	Small ubiquitin-related modifier 2;Small ubiquitin-related modifier 3;Small ubiquitin-related modifier 4				HMMR	3161	HMMR	hyaluronan mediated motility receptor		KIF20B	9585	KIF20B	kinesin family member 20B
ADNP	Activity-dependent neuroprotector homeobox protein				HNRNPD	3184	HNRNPD	heterogeneous nuclear ribonucleoprotein...		KIF22	3835	KIF22	kinesin family member 22
ZEB1	Zinc finger E-box-binding homeobox 1				HNRNPU	3192	HNRNPU	heterogeneous nuclear ribonucleoprotein...		KIF23	9493	KIF23	kinesin family member 23
ARID5B	AT-rich interactive domain-containing protein 5B				HOXC10	3226	HOXC10	homeobox C10		KIF2C	11004	KIF2C	kinesin family member 2C
ETV6	Transcription factor ETV6				HSPA8	3312	HSPA8	heat shock protein family A (Hsp70) mem...		KIF3B	9371	KIF3B	kinesin family member 3B
ATN1	Atrophin-1				HUS1	3364	HUS1	HUS1 checkpoint clamp component		KIF4A	24137	KIF4A	kinesin family member 4A
ZMYM2	Zinc finger MYM-type protein 2				ILF3	3609	ILF3	interleukin enhancer binding factor 3		KIF5B	3799	KIF5B	kinesin family member 5B
NACC1	Nucleus accumbens-associated protein 1				INCENP	3619	INCENP	inner centromere protein		KNTC1	9735	KNTC1	kinetochore associated 1
HNRNPUL1	Heterogeneous nuclear ribonucleoprotein U-like protein 1				KATNA1	11104	KATNA1	katanin catalytic subunit A1		KPTN	11133	KPTN	kaptin, actin binding protein
HSF2	Heat shock factor protein 2				KIF11	3832	KIF11	kinesin family member 11		LATS1	9113	LATS1	large tumor suppressor kinase 1
ZNF518A	Zinc finger protein 518A				KIF15	56992	KIF15	kinesin family member 15		LLGL1	3996	LLGL1	LLGL scribble cell polarity complex comp...
NAB1	NGFI-A-binding protein 1				KIF20B	9585	KIF20B	kinesin family member 20B		LMNB1	4001	LMNB1	lamin B1
SATB2	DNA-binding protein SATB;DNA-binding protein SATB2				KIF22	3835	KIF22	kinesin family member 22		LRPPRC	10128	LRPPRC	leucine rich pentatricopeptide repeat co...
ZNHIT6	Box C/D snoRNA protein 1				KIF23	9493	KIF23	kinesin family member 23		MAP3K11	4296	MAP3K11	mitogen-activated protein kinase kinase ...
ZNF148	Zinc finger protein 148				KIF2C	11004	KIF2C	kinesin family member 2C		MAPRE1	22919	MAPRE1	microtubule associated protein RP/EB fam...
MATR3	Matrin-3				KIF4A	24137	KIF4A	kinesin family member 4A		MARK4	57787	MARK4	microtubule affinity regulating kinase 4...
BRD8	Bromodomain-containing protein 8				KIF5B	3799	KIF5B	kinesin family member 5B		MID1IP1	58526	MID1IP1	MID1 interacting protein 1
RBM6	RNA-binding protein 6				KPNA2	3838	KPNA2	karyopherin subunit alpha 2		MYH10	4628	MYH10	myosin heavy chain 10
ZNF189	Zinc finger protein 189				LIG3	3980	LIG3	DNA ligase 3		MYH9	4627	MYH9	myosin heavy chain 9
YY1	Transcriptional repressor protein YY1				LMNB1	4001	LMNB1	lamin B1		MYO1E	4643	MYO1E	myosin IE
RBM12B	RNA-binding protein 12B				MAD2L1	4085	MAD2L1	mitotic arrest deficient 2 like 1		NDC80	10403	NDC80	NDC80 kinetochore complex component
FOXM1	Forkhead box protein M1				MAPK14	1432	MAPK14	mitogen-activated protein kinase 14		NEK2	4751	NEK2	NIMA related kinase 2
NKTR	NK-tumor recognition protein;Putative peptidyl-prolyl cis-trans isomerase				MCM2	4171	MCM2	minichromosome maintenance complex comp...		NET1	10276	NET1	neuroepithelial cell transforming 1
ZBTB20	Zinc finger and BTB domain-containing protein 20				MCM3	4172	MCM3	minichromosome maintenance complex comp...		NF1	4763	NF1	neurofibromin 1
ZNF48	Zinc finger protein 48				MCM5	4174	MCM5	minichromosome maintenance complex comp...		NOTCH2	4853	NOTCH2	notch receptor 2
SP100	Nuclear autoantigen Sp-100				MCM6	4175	MCM6	minichromosome maintenance complex comp...		NUMA1	4926	NUMA1	nuclear mitotic apparatus protein 1
ZSCAN31	Zinc finger and SCAN domain-containing protein 31				MEIS1	4211	MEIS1	Meis homeobox 1		OPHN1	4983	OPHN1	oligophrenin 1
NRIP1	Nuclear receptor-interacting protein 1				MKI67	4288	MKI67	marker of proliferation Ki-67		PAFAH1B1	5048	PAFAH1B1	platelet activating factor acetylhydrola...
ACIN1	Apoptotic chromatin condensation inducer in the nucleus				MNAT1	4331	MNAT1	MNAT1 component of CDK activating kinas...		PALLD	23022	PALLD	palladin, cytoskeletal associated protei...
ZNF24	Zinc finger protein 24				MTF2	22823	MTF2	metal response element binding transcri...		PCGF5	84333	PCGF5	polycomb group ring finger 5
ZNF12	Zinc finger protein 12				MYBL2	4605	MYBL2	MYB proto-oncogene like 2		PDLIM5	10611	PDLIM5	PDZ and LIM domain 5
MKI67	Antigen KI-67				MYC	4609	MYC	MYC proto-oncogene, bHLH transcription ...		PIF1	80119	PIF1	PIF1 5'-to-3' DNA helicase
LMNA	Prelamin-A/C;Lamin-A/C				NASP	4678	NASP	nuclear autoantigenic sperm protein		PLK1	5347	PLK1	polo like kinase 1
RBMX	RNA-binding motif protein, X chromosome;RNA-binding motif protein, X chromosome, N-terminally processed				NCL	4691	NCL	nucleolin		PRC1	9055	PRC1	protein regulator of cytokinesis 1
CHD9	Chromodomain-helicase-DNA-binding protein 9				NDC80	10403	NDC80	NDC80 kinetochore complex component		PXN	5829	PXN	paxillin
ZNF800	Zinc finger protein 800				NEK2	4751	NEK2	NIMA related kinase 2		RAB3GAP1	22930	RAB3GAP1	RAB3 GTPase activating protein catalytic...
KIF23	Kinesin-like protein KIF23;Kinesin-like protein				NOLC1	9221	NOLC1	nucleolar and coiled-body phosphoprotei...		RABGAP1	23637	RABGAP1	RAB GTPase activating protein 1
GATAD2A	Transcriptional repressor p66-alpha				NOTCH2	4853	NOTCH2	notch receptor 2		RACGAP1	29127	RACGAP1	Rac GTPase activating protein 1
ZBTB2	Zinc finger and BTB domain-containing protein 2				NUMA1	4926	NUMA1	nuclear mitotic apparatus protein 1		RANBP9	10048	RANBP9	RAN binding protein 9
RNF216	E3 ubiquitin-protein ligase RNF216				NUP50	10762	NUP50	nucleoporin 50		RAPGEF6	51735	RAPGEF6	Rap guanine nucleotide exchange factor 6...
TCOF1	Treacle protein				NUP98	4928	NUP98	nucleoporin 98 and 96 precursor		RFC1	5981	RFC1	replication factor C subunit 1
TSHZ2	Teashirt homolog 2				ODC1	4953	ODC1	ornithine decarboxylase 1		RICTOR	253260	RICTOR	RPTOR independent companion of MTOR comp...
ZNF462	Zinc finger protein 462				ODF2	4957	ODF2	outer dense fiber of sperm tails 2		ROCK1	6093	ROCK1	Rho associated coiled-coil containing pr...
KNOP1	Lysine-rich nucleolar protein 1				ORC5	5001	ORC5	origin recognition complex subunit 5		SAC3D1	29901	SAC3D1	SAC3 domain containing 1
KDM5B	Lysine-specific demethylase 5B				ORC6	23594	ORC6	origin recognition complex subunit 6		SHROOM2	357	SHROOM2	shroom family member 2
HMCES	Embryonic stem cell-specific 5-hydroxymethylcytosine-binding protein				PAFAH1B1	5048	PAFAH1B1	platelet activating factor acetylhydrol...		SMC1A	8243	SMC1A	structural maintenance of chromosomes 1A...
SAP18	Histone deacetylase complex subunit SAP18				PBK	55872	PBK	PDZ binding kinase		SMC3	9126	SMC3	structural maintenance of chromosomes 3 ...
L3MBTL2	Lethal(3)malignant brain tumor-like protein 2				PDS5B	23047	PDS5B	PDS5 cohesin associated factor B		SMC4	10051	SMC4	structural maintenance of chromosomes 4 ...
THRAP3	Thyroid hormone receptor-associated protein 3				PLK1	5347	PLK1	polo like kinase 1		SORBS2	8470	SORBS2	sorbin and SH3 domain containing 2
HSF1	Heat shock factor protein 1				PLK4	10733	PLK4	polo like kinase 4		SPTAN1	6709	SPTAN1	spectrin alpha, non-erythrocytic 1
GATAD2B	Transcriptional repressor p66-beta				PML	5371	PML	PML nuclear body scaffold		SPTBN1	6711	SPTBN1	spectrin beta, non-erythrocytic 1
ZNF646	Zinc finger protein 646				POLA2	23649	POLA2	DNA polymerase alpha 2, accessory subun...		STAU1	6780	STAU1	staufen double-stranded RNA binding prot...
ADAR	Double-stranded RNA-specific adenosine deaminase				POLE	5426	POLE	DNA polymerase epsilon, catalytic subun...		STK38L	23012	STK38L	serine/threonine kinase 38 like
ZBTB10	Zinc finger and BTB domain-containing protein 10				POLQ	10721	POLQ	DNA polymerase theta		SUN2	25777	SUN2	Sad1 and UNC84 domain containing 2
CD3EAP	DNA-directed RNA polymerase I subunit RPA34				PRC1	9055	PRC1	protein regulator of cytokinesis 1		SYNPO	11346	SYNPO	synaptopodin
ZBTB43	Zinc finger and BTB domain-containing protein 43				PRIM2	5558	PRIM2	DNA primase subunit 2		TAOK2	9344	TAOK2	TAO kinase 2
TCF12	Transcription factor 12				PRMT5	10419	PRMT5	protein arginine methyltransferase 5		TOP2A	7153	TOP2A	DNA topoisomerase II alpha
NCOR2	Nuclear receptor corepressor 2				PRPF4B	8899	PRPF4B	pre-mRNA processing factor 4B		TPX2	22974	TPX2	TPX2 microtubule nucleation factor
PARP1	Poly [ADP-ribose] polymerase 1				PTTG1	9232	PTTG1	PTTG1 regulator of sister chromatid sep...		TRIO	7204	TRIO	trio Rho guanine nucleotide exchange fac...
ZKSCAN1	Zinc finger protein with KRAB and SCAN domains 1				RACGAP1	29127	RACGAP1	Rac GTPase activating protein 1		TTK	7272	TTK	TTK protein kinase
WHSC1L1	Histone-lysine N-methyltransferase NSD3				RAD21	5885	RAD21	RAD21 cohesin complex component		TUBA4A	7277	TUBA4A	tubulin alpha 4a
RLF	Zinc finger protein Rlf				RAD54L	8438	RAD54L	RAD54 like		TUBGCP2	10844	TUBGCP2	tubulin gamma complex associated protein...
IFI16	Gamma-interferon-inducible protein 16				RBL1	5933	RBL1	RB transcriptional corepressor like 1		TUBGCP3	10426	TUBGCP3	tubulin gamma complex associated protein...
ZNF280D	Zinc finger protein 280D				RBM14	10432	RBM14	RNA binding motif protein 14		UXT	8409	UXT	ubiquitously expressed prefoldin like ch...
BEND3	BEN domain-containing protein 3				RPA2	6118	RPA2	replication protein A2		WASF2	10163	WASF2	WASP family member 2
TCF3	Transcription factor E2-alpha				RPS6KA5	9252	RPS6KA5	ribosomal protein S6 kinase A5		YWHAE	7531	YWHAE	tyrosine 3-monooxygenase/tryptophan 5-mo...
SETDB1	Histone-lysine N-methyltransferase SETDB1				SAP30	8819	SAP30	Sin3A associated protein 30		ABI1	10006	ABI1	abl interactor 1
USP39	U4/U6.U5 tri-snRNP-associated protein 2				SFPQ	6421	SFPQ	splicing factor proline and glutamine r...		ABL1	25	ABL1	ABL proto-oncogene 1, non-receptor tyros...
ZC3H11A	Zinc finger CCCH domain-containing protein 11A				SMARCC1	6599	SMARCC1	SWI/SNF related, matrix associated, act...		ABR	29	ABR	ABR activator of RhoGEF and GTPase
NCOR1	Nuclear receptor corepressor 1				SMC1A	8243	SMC1A	structural maintenance of chromosomes 1...		ACTN4	81	ACTN4	actinin alpha 4
ZNF445	Zinc finger protein 445				SMC4	10051	SMC4	structural maintenance of chromosomes 4...		AKAP13	11214	AKAP13	A-kinase anchoring protein 13
NAB2	NGFI-A-binding protein 2				SNRPD1	6632	SNRPD1	small nuclear ribonucleoprotein D1 poly...		ALS2	57679	ALS2	alsin Rho guanine nucleotide exchange fa...
ZBTB9	Zinc finger and BTB domain-containing protein 9				SQLE	6713	SQLE	squalene epoxidase		APC	324	APC	APC regulator of WNT signaling pathway
ARID4B	AT-rich interactive domain-containing protein 4B				SRSF1	6426	SRSF1	serine and arginine rich splicing facto...		ARF6	382	ARF6	ADP ribosylation factor 6
ZKSCAN8	Zinc finger protein with KRAB and SCAN domains 8				SRSF10	10772	SRSF10	serine and arginine rich splicing facto...		ARFGEF1	10565	ARFGEF1	ADP ribosylation factor guanine nucleoti...
DHX38	Pre-mRNA-splicing factor ATP-dependent RNA helicase PRP16				SRSF2	6427	SRSF2	serine and arginine rich splicing facto...		ARFIP2	23647	ARFIP2	ADP ribosylation factor interacting prot...
PCF11	Pre-mRNA cleavage complex 2 protein Pcf11				STIL	6491	STIL	STIL centriolar assembly protein		ARHGAP27	201176	ARHGAP27	Rho GTPase activating protein 27
BNC2	Zinc finger protein basonuclin-2				SUV39H1	6839	SUV39H1	SUV39H1 histone lysine methyltransferas...		ARHGAP4	393	ARHGAP4	Rho GTPase activating protein 4
UTP14A	U3 small nucleolar RNA-associated protein 14 homolog A				SYNCRIP	10492	SYNCRIP	synaptotagmin binding cytoplasmic RNA i...		ARHGAP5	394	ARHGAP5	Rho GTPase activating protein 5
TERF2IP	Telomeric repeat-binding factor 2-interacting protein 1				TACC3	10460	TACC3	transforming acidic coiled-coil contain...		ARHGEF11	9826	ARHGEF11	Rho guanine nucleotide exchange factor 1...
YLPM1	YLP motif-containing protein 1				TFDP1	7027	TFDP1	transcription factor Dp-1		ARHGEF12	23365	ARHGEF12	Rho guanine nucleotide exchange factor 1...
CBX4	E3 SUMO-protein ligase CBX4				TGFB1	7040	TGFB1	transforming growth factor beta 1		ARHGEF2	9181	ARHGEF2	Rho/Rac guanine nucleotide exchange fact...
U2SURP	U2 snRNP-associated SURP motif-containing protein				TLE3	7090	TLE3	TLE family member 3, transcriptional co...		ARL8A	127829	ARL8A	ADP ribosylation factor like GTPase 8A
CCAR1	Cell division cycle and apoptosis regulator protein 1				TMPO	7112	TMPO	thymopoietin		ATG4B	23192	ATG4B	autophagy related 4B cysteine peptidase ...
JUNB	Transcription factor jun-B				TOP1	7150	TOP1	DNA topoisomerase I		AZI1	22994	CEP131	centrosomal protein 131
NONO	Non-POU domain-containing octamer-binding protein				TOP2A	7153	TOP2A	DNA topoisomerase II alpha		BCL2L11	10018	BCL2L11	BCL2 like 11
RBBP8	DNA endonuclease RBBP8				TPX2	22974	TPX2	TPX2 microtubule nucleation factor		BCR	613	BCR	BCR activator of RhoGEF and GTPase
UTP18	U3 small nucleolar RNA-associated protein 18 homolog				TRA2B	6434	TRA2B	transformer 2 beta homolog		CAPZB	832	CAPZB	capping actin protein of muscle Z-line s...
EXOSC10	Exosome component 10				TRAIP	10293	TRAIP	TRAF interacting protein		CCDC88A	55704	CCDC88A	coiled-coil domain containing 88A
PNN	Pinin				TTK	7272	TTK	TTK protein kinase		CCNB2	9133	CCNB2	cyclin B2
MYBL2	Myb-related protein B				UBE2C	11065	UBE2C	ubiquitin conjugating enzyme E2 C		CDC42	998	CDC42	cell division cycle 42
KRT17	Keratin, type I cytoskeletal 17				UBE2S	27338	UBE2S	ubiquitin conjugating enzyme E2 S		CDC42EP1	11135	CDC42EP1	CDC42 effector protein 1
BHLHE40	Class E basic helix-loop-helix protein 40				UCK2	7371	UCK2	uridine-cytidine kinase 2		CDK1	983	CDK1	cyclin dependent kinase 1
ZNF263	Zinc finger protein 263				UPF1	5976	UPF1	UPF1 RNA helicase and ATPase		CENPE	1062	CENPE	centromere protein E
RSBN1L	Round spermatid basic protein 1-like protein				WRN	7486	WRN	WRN RecQ like helicase		CENPF	1063	CENPF	centromere protein F
RANBP2	E3 SUMO-protein ligase RanBP2				YTHDC1	91746	YTHDC1	YTH domain containing 1		CENPJ	55835	CENPJ	centromere protein J
PRDM2	PR domain zinc finger protein 2				ABL1	25	ABL1	ABL proto-oncogene 1, non-receptor tyro...		CEP192	55125	CEP192	centrosomal protein 192
BRD4	Bromodomain-containing protein 4				AMD1	262	AMD1	adenosylmethionine decarboxylase 1		CLASP1	23332	CLASP1	cytoplasmic linker associated protein 1 ...
EHMT1	Histone-lysine N-methyltransferase EHMT1				CASC5	57082	KNL1	kinetochore scaffold 1		CLIP1	6249	CLIP1	CAP-Gly domain containing linker protein...
ELMSAN1	ELM2 and SANT domain-containing protein 1				CCNB2	9133	CCNB2	cyclin B2		CLIP2	7461	CLIP2	CAP-Gly domain containing linker protein...
ZNF180	Zinc finger protein 180				CDK1	983	CDK1	cyclin dependent kinase 1		CRIPAK
HNRNPR	Heterogeneous nuclear ribonucleoprotein R				CDKN1B	1027	CDKN1B	cyclin dependent kinase inhibitor 1B		CSNK1D	1453	CSNK1D	casein kinase 1 delta
PIAS1	E3 SUMO-protein ligase PIAS1				CDKN2C	1031	CDKN2C	cyclin dependent kinase inhibitor 2C		CYTH2	9266	CYTH2	cytohesin 2
SLTM	SAFB-like transcription modulator				CDKN3	1033	CDKN3	cyclin dependent kinase inhibitor 3		DLG1	1739	DLG1	discs large MAGUK scaffold protein 1
HMG20B	SWI/SNF-related matrix-associated actin-dependent regulator of chromatin subfamily E member 1-related				CENPA	1058	CENPA	centromere protein A		FARP1	10160	FARP1	FERM, ARH/RhoGEF and pleckstrin domain p...
SPRTN	SprT-like domain-containing protein Spartan				CENPE	1062	CENPE	centromere protein E		FGD4	121512	FGD4	FYVE, RhoGEF and PH domain containing 4 ...
MBIP	MAP3K12-binding inhibitory protein 1				CENPF	1063	CENPF	centromere protein F		FGD6	55785	FGD6	FYVE, RhoGEF and PH domain containing 6 ...
SERBP1	Plasminogen activator inhibitor 1 RNA-binding protein				CHMP1A	5119	CHMP1A	charged multivesicular body protein 1A ...		GEMIN4	50628	GEMIN4	gem nuclear organelle associated protein...
BLM	Bloom syndrome protein				CUL5	8065	CUL5	cullin 5		HDAC6	10013	HDAC6	histone deacetylase 6
TOPORS	E3 ubiquitin-protein ligase Topors				DMD	1756	DMD	dystrophin		HOOK3	84376	HOOK3	hook microtubule tethering protein 3
SP3	Transcription factor Sp3				DTYMK	1841	DTYMK	deoxythymidylate kinase		ITSN1	6453	ITSN1	intersectin 1
ZNF318	Zinc finger protein 318				E2F1	1869	E2F1	E2F transcription factor 1		KIF3C	3797	KIF3C	kinesin family member 3C
JUN	Transcription factor AP-1				E2F3	1871	E2F3	E2F transcription factor 3		KIFAP3	22920	KIFAP3	kinesin associated protein 3
ARID4A	AT-rich interactive domain-containing protein 4A				E2F4	1874	E2F4	E2F transcription factor 4		KLC1	3831	KLC1	kinesin light chain 1
EIF4A3	Eukaryotic initiation factor 4A-III;Eukaryotic initiation factor 4A-III, N-terminally processed				EFNA5	1946	EFNA5	ephrin A5		MAP1S	55201	MAP1S	microtubule associated protein 1S
HDX	Highly divergent homeobox				EWSR1	2130	EWSR1	EWS RNA binding protein 1		MARCKS	4082	MARCKS	myristoylated alanine rich protein kinas...
PNISR	Arginine/serine-rich protein PNISR				FANCC	2176	FANCC	FA complementation group C		MID1	4281	MID1	midline 1
PIAS2	E3 SUMO-protein ligase PIAS2				FOXN3	1112	FOXN3	forkhead box N3		MYO9B	4650	MYO9B	myosin IXB
BMS1	Ribosome biogenesis protein BMS1 homolog				GSPT1	2935	GSPT1	G1 to S phase transition 1		NCK1	4690	NCK1	NCK adaptor protein 1
CUX1	Homeobox protein cut-like 1				H2AFV	94239	H2AZ2	H2A.Z variant histone 2		NCK2	8440	NCK2	NCK adaptor protein 2
SCAF11	Protein SCAF11				H2AFX	3014	H2AX	H2A.X variant histone		NEDD9	4739	NEDD9	neural precursor cell expressed, develop...
ZBTB33	Transcriptional regulator Kaiso				H2AFZ	3015	H2AZ1	H2A.Z variant histone 1		NIN	51199	NIN	ninein
RUVBL2	RuvB-like 2				HIST1H2BK	85236	H2BC12	H2B clustered histone 12		NUSAP1	51203	NUSAP1	nucleolar and spindle associated protein...
HNRNPC	Heterogeneous nuclear ribonucleoproteins C1/C2				HMGB3	3149	HMGB3	high mobility group box 3		PCM1	5108	PCM1	pericentriolar material 1
ZHX1	Zinc fingers and homeoboxes protein 1				HN1	51155	JPT1	Jupiter microtubule associated homolog ...		PCNT	5116	PCNT	pericentrin
HMBOX1	Homeobox-containing protein 1				KPNB1	3837	KPNB1	karyopherin subunit beta 1		PKD2	5311	PKD2	polycystin 2, transient receptor potenti...
ZZZ3	ZZ-type zinc finger-containing protein 3				LBR	3930	LBR	lamin B receptor		PLEKHG2	64857	PLEKHG2	pleckstrin homology and RhoGEF domain co...
ZNF33A	Zinc finger protein 33A				MARCKS	4082	MARCKS	myristoylated alanine rich protein kina...		PPP4R2	151987	PPP4R2	protein phosphatase 4 regulatory subunit...
DKC1	H/ACA ribonucleoprotein complex subunit 4				MEIS2	4212	MEIS2	Meis homeobox 2		PREX1	57580	PREX1	phosphatidylinositol-3,4,5-trisphosphate...
CREB3L2	Cyclic AMP-responsive element-binding protein 3-like protein 2;Processed cyclic AMP-responsive element-binding protein 3-like protein 2				MT2A	4502	MT2A	metallothionein 2A		RALBP1	10928	RALBP1	ralA binding protein 1
SRBD1	S1 RNA-binding domain-containing protein 1				NUSAP1	51203	NUSAP1	nucleolar and spindle associated protei...		RAPGEF5	9771	RAPGEF5	Rap guanine nucleotide exchange factor 5...
CEBPB	CCAAT/enhancer-binding protein beta				PAPD7	11044	TENT4A	terminal nucleotidyltransferase 4A		RASA1	5921	RASA1	RAS p21 protein activator 1
XRCC5	X-ray repair cross-complementing protein 5				PTTG3P	26255	PTTG3P	pituitary tumor-transforming 3, pseudog...		RASA2	5922	RASA2	RAS p21 protein activator 2
CENPC	Centromere protein C				PURA	5813	PURA	purine rich element binding protein A		RASAL2	9462	RASAL2	RAS protein activator like 2
SAP130	Histone deacetylase complex subunit SAP130				RAD23B	5887	RAD23B	RAD23 homolog B, nucleotide excision re...		RHOF	54509	RHOF	ras homolog family member F, filopodia a...
ZFP62	Zinc finger protein 62 homolog				RASAL2	9462	RASAL2	RAS protein activator like 2		RHOT2	89941	RHOT2	ras homolog family member T2
MCM10	Protein MCM10 homolog				SETD8	387893	KMT5A	lysine methyltransferase 5A		SASS6	163786	SASS6	SAS-6 centriolar assembly protein
ZMAT2	Zinc finger matrin-type protein 2				SLC12A2	6558	SLC12A2	solute carrier family 12 member 2		2009-09-01	10801	SEPTIN9	septin 9
ZIC2	Zinc finger protein ZIC 2				SLC38A1	81539	SLC38A1	solute carrier family 38 member 1		SHROOM1	134549	SHROOM1	shroom family member 1
ZNF687	Zinc finger protein 687				SLC7A1	6541	SLC7A1	solute carrier family 7 member 1		SOS1	6654	SOS1	SOS Ras/Rac guanine nucleotide exchange ...
UIMC1	BRCA1-A complex subunit RAP80				SLC7A5	8140	SLC7A5	solute carrier family 7 member 5		SSH2	85464	SSH2	slingshot protein phosphatase 2
MORC2	MORC family CW-type zinc finger protein 2				SMAD3	4088	SMAD3	SMAD family member 3		TBCD	6904	TBCD	tubulin folding cofactor D
RBAK	RB-associated KRAB zinc finger protein				SMC2	10592	SMC2	structural maintenance of chromosomes 2...		TIAM1	7074	TIAM1	TIAM Rac1 associated GEF 1
HDAC1	Histone deacetylase 1				SS18	6760	SS18	SS18 subunit of BAF chromatin remodelin...		TLK1	9874	TLK1	tousled like kinase 1
ZNF609	Zinc finger protein 609				STAG1	10274	STAG1	stromal antigen 1		TSC1	7248	TSC1	TSC complex subunit 1
MAFA	Transcription factor MafA				STMN1	3925	STMN1	stathmin 1		TUBD1	51174	TUBD1	tubulin delta 1
SF3B2	Splicing factor 3B subunit 2				TNPO2	30000	TNPO2	transportin 2		TUBGCP5	114791	TUBGCP5	tubulin gamma complex associated protein...
CWF19L2	CWF19-like protein 2				TROAP	10024	TROAP	trophinin associated protein		TUBGCP6	85378	TUBGCP6	tubulin gamma complex associated protein...
ZBTB25	Zinc finger and BTB domain-containing protein 25				WHSC1	7468	NSD2	nuclear receptor binding SET domain pro...		VCL	7414	VCL	vinculin
RCOR1	REST corepressor 1				XPO1	7514	XPO1	exportin 1		WASF1	8936	WASF1	WASP family member 1
ZNF460	Zinc finger protein 460				ZAK	51776	MAP3K20	mitogen-activated protein kinase kinase..		WASL	8976	WASL	WASP like actin nucleation promoting fac...
BAZ1B	Tyrosine-protein kinase BAZ1B
FAM161A	Protein FAM161A
SFPQ	Splicing factor, proline- and glutamine-rich
CACTIN	Cactin
TET3	Methylcytosine dioxygenase TET3
FOXK2	Forkhead box protein K2
SUMO1	Small ubiquitin-related modifier 1
ZKSCAN4	Zinc finger protein with KRAB and SCAN domains 4
DDX5	Probable ATP-dependent RNA helicase DDX5
PHIP	PH-interacting protein
ZFP69B	Zinc finger protein ZFP69B
RPS27A;UBA52	Ubiquitin-40S ribosomal protein S27a;Ubiquitin;40S ribosomal protein S27a;Ubiquitin-60S ribosomal protein L40;Ubiquitin;60S ribosomal protein L40
ZNF224	Zinc finger protein 224
TP53BP1	Tumor suppressor p53-binding protein 1
MDC1	Mediator of DNA damage checkpoint protein 1
MAF	Transcription factor Maf
SRRM1	Serine/arginine repetitive matrix protein 1
RBM27	RNA-binding protein 27
ZNF35	Zinc finger protein 35
C17orf85	Uncharacterized protein C17orf85
CCNT1	Cyclin-T1
CHD8	Chromodomain-helicase-DNA-binding protein 8
PBRM1	Protein polybromo-1
ZNF496	Zinc finger protein 496
ZMYM3	Zinc finger MYM-type protein 3
ETV3	ETS translocation variant 3
SNW1	SNW domain-containing protein 1
MSL2	E3 ubiquitin-protein ligase MSL2
ZNF282	Zinc finger protein 282
BRCA1	Breast cancer type 1 susceptibility protein
BCORL1	BCL-6 corepressor-like protein 1
SALL4	Sal-like protein 4
ZSCAN25	Zinc finger and SCAN domain-containing protein 25
FTSJ3	pre-rRNA processing protein FTSJ3
BCL11B	B-cell lymphoma/leukemia 11B
SMARCAD1	SWI/SNF-related matrix-associated actin-dependent regulator of chromatin subfamily A containing DEAD/H box 1
SRRM2	Serine/arginine repetitive matrix protein 2
LMNB1	Lamin-B1
NIFK	MKI67 FHA domain-interacting nucleolar phosphoprotein
C5orf24	UPF0461 protein C5orf24
PRPF4B	Serine/threonine-protein kinase PRP4 homolog
MIS18BP1	Mis18-binding protein 1
DNTTIP2	Deoxynucleotidyltransferase terminal-interacting protein 2
ZNF777	Zinc finger protein 777
DPF2	Zinc finger protein ubi-d4
KRT8	Keratin, type II cytoskeletal 8
ARID3A	AT-rich interactive domain-containing protein 3A
BAZ2A	Bromodomain adjacent to zinc finger domain protein 2A
NFRKB	Nuclear factor related to kappa-B-binding protein
ESRRA	Steroid hormone receptor ERR1
NUFIP2	Nuclear fragile X mental retardation-interacting protein 2
SLX4IP	Protein SLX4IP
RSBN1	Round spermatid basic protein 1
RBM15B	Putative RNA-binding protein 15B
GATA6	Transcription factor GATA-6
C11orf84	Uncharacterized protein C11orf84
ETV1	ETS translocation variant 1
PPHLN1	Periphilin-1
ZNF326	DBIRD complex subunit ZNF326
MSANTD4	Myb/SANT-like DNA-binding domain-containing protein 4
ZNF618	Zinc finger protein 618
NACC2	Nucleus accumbens-associated protein 2
NCOA2	Nuclear receptor coactivator 2
NCL	Nucleolin
ZC3H13	Zinc finger CCCH domain-containing protein 13
TCERG1	Transcription elongation regulator 1
FBRSL1	Fibrosin-1-like protein
YY1AP1	YY1-associated protein 1
BRMS1L	Breast cancer metastasis-suppressor 1-like protein
SF3A1	Splicing factor 3A subunit 1
KDM2B	Lysine-specific demethylase 2B
DSP	Desmoplakin
CCT5	T-complex protein 1 subunit epsilon
SETX	Probable helicase senataxin
ZCCHC7	Zinc finger CCHC domain-containing protein 7
ATAD5	ATPase family AAA domain-containing protein 5
HOMEZ	Homeobox and leucine zipper protein Homez
LAS1L	Ribosomal biogenesis protein LAS1L
HIPK1	Homeodomain-interacting protein kinase 1
ACTB;ACTG1	Actin, cytoplasmic 1;Actin, cytoplasmic 1, N-terminally processed;Actin, cytoplasmic 2;Actin, cytoplasmic 2, N-terminally processed
KRT9	Keratin, type I cytoskeletal 9
PHF14	PHD finger protein 14
HJURP	Holliday junction recognition protein
ZNF316	Zinc finger protein 316
HOXC10	Homeobox protein Hox-C10
NOLC1	Nucleolar and coiled-body phosphoprotein 1
ZNF142	Zinc finger protein 142
UTP11L	Probable U3 small nucleolar RNA-associated protein 11
IK	Protein Red
KHDRBS1	KH domain-containing, RNA-binding, signal transduction-associated protein 1
DDX46	Probable ATP-dependent RNA helicase DDX46
ZKSCAN5	Zinc finger protein with KRAB and SCAN domains 5
ATAD2	ATPase family AAA domain-containing protein 2
ZMIZ2	Zinc finger MIZ domain-containing protein 2
NFAT5	Nuclear factor of activated T-cells 5
BRD7	Bromodomain-containing protein 7
ADNP2	ADNP homeobox protein 2
ATRX	Transcriptional regulator ATRX
EXOSC9	Exosome complex component RRP45
ETS1	Protein C-ets-1
SMARCC2	SWI/SNF complex subunit SMARCC2
KRT14	Keratin, type I cytoskeletal 14
MPHOSPH10	U3 small nucleolar ribonucleoprotein protein MPP10
CDK12	Cyclin-dependent kinase 12
AHRR	Aryl hydrocarbon receptor repressor
IRF2BP2	Interferon regulatory factor 2-binding protein 2
HNRNPL	Heterogeneous nuclear ribonucleoprotein L
GTF3C1	General transcription factor 3C polypeptide 1
ETV5	ETS translocation variant 5
ZNF592	Zinc finger protein 592
BRIX1	Ribosome biogenesis protein BRX1 homolog
RPL14	60S ribosomal protein L14
RBM14	RNA-binding protein 14
ZSCAN21	Zinc finger and SCAN domain-containing protein 21
ZNF608	Zinc finger protein 608
RAD54L2	Helicase ARIP4
ZC3H18	Zinc finger CCCH domain-containing protein 18
ZNF710	Zinc finger protein 710
ZBTB46	Zinc finger and BTB domain-containing protein 46
ZNF394	Zinc finger protein 394
NPM1	Nucleophosmin
KANSL1	KAT8 regulatory NSL complex subunit 1
SKIL	Ski-like protein
ZSCAN32	Zinc finger and SCAN domain-containing protein 32
POLR3E	DNA-directed RNA polymerase III subunit RPC5
XRCC6	X-ray repair cross-complementing protein 6
PIAS4	E3 SUMO-protein ligase PIAS4
BPTF	Nucleosome-remodeling factor subunit BPTF;Nucleosome-remodeling factor subunit BPTF (Fragment)
EPC2	Enhancer of polycomb homolog 2
XPC	DNA repair protein complementing XP-C cells
ZNF267	Zinc finger protein 267
PHF21A	PHD finger protein 21A
MAP7	Ensconsin
RRP15	RRP15-like protein
INTS12	Integrator complex subunit 12
FOXC2	Forkhead box protein C2
ZNF746	Zinc finger protein 746
RBM15	Putative RNA-binding protein 15
ZNF775	Zinc finger protein 775
RPL3	60S ribosomal protein L3
VIM	Vimentin
NUMA1	Nuclear mitotic apparatus protein 1
HNRNPU	Heterogeneous nuclear ribonucleoprotein U
SUPT7L	STAGA complex 65 subunit gamma
DDX41	Probable ATP-dependent RNA helicase DDX41
PHF20L1	PHD finger protein 20-like protein 1
UBA2	SUMO-activating enzyme subunit 2
PRRC2B	Protein PRRC2B
POLD3	DNA polymerase delta subunit 3
UBR7	Putative E3 ubiquitin-protein ligase UBR7
GPATCH8	G patch domain-containing protein 8
MAFG	Transcription factor MafG
BCOR	BCL-6 corepressor
HNRNPA1;HNRNPA1L2	Heterogeneous nuclear ribonucleoprotein A1;Heterogeneous nuclear ribonucleoprotein A1, N-terminally processed;Heterogeneous nuclear ribonucleoprotein A1-like 2
TDG	G/T mismatch-specific thymine DNA glycosylase
AHNAK	Neuroblast differentiation-associated protein AHNAK
ZKSCAN2	Zinc finger protein with KRAB and SCAN domains 2
LCORL	Ligand-dependent nuclear receptor corepressor-like protein
DDX24	ATP-dependent RNA helicase DDX24
SSFA2	Sperm-specific antigen 2
PTRF	Polymerase I and transcript release factor
PIAS3	E3 SUMO-protein ligase PIAS3
ZBTB5	Zinc finger and BTB domain-containing protein 5
VEZF1	Vascular endothelial zinc finger 1
ZFP1	Zinc finger protein 1 homolog
SALL1	Sal-like protein 1
PRPF40A	Pre-mRNA-processing factor 40 homolog A
ZFP91;ZFP91-CNTF	E3 ubiquitin-protein ligase ZFP91
BCL11A	B-cell lymphoma/leukemia 11A
HNRNPA2B1	Heterogeneous nuclear ribonucleoproteins A2/B1
CIZ1	Cip1-interacting zinc finger protein
XRCC1	DNA repair protein XRCC1
DSN1	Kinetochore-associated protein DSN1 homolog
ZMYND11	Zinc finger MYND domain-containing protein 11
BARD1	BRCA1-associated RING domain protein 1
ZNF250	Zinc finger protein 250
HNRNPLL;HNRPLL	Heterogeneous nuclear ribonucleoprotein L-like
MSL1	Male-specific lethal 1 homolog
ZNF444	Zinc finger protein 444
ZMYM1	Zinc finger MYM-type protein 1
ZEB2	Zinc finger E-box-binding homeobox 2
PHF12	PHD finger protein 12
HNRNPA3	Heterogeneous nuclear ribonucleoprotein A3
CHD3	Chromodomain-helicase-DNA-binding protein 3
GAPDH	Glyceraldehyde-3-phosphate dehydrogenase
KRT18	Keratin, type I cytoskeletal 18
QSER1	Glutamine and serine-rich protein 1
SMARCA5	SWI/SNF-related matrix-associated actin-dependent regulator of chromatin subfamily A member 5
CBX3	Chromobox protein homolog 3
TPX2	Targeting protein for Xklp2
SMARCC1	SWI/SNF complex subunit SMARCC1
RNF169	E3 ubiquitin-protein ligase RNF169
POGK	Pogo transposable element with KRAB domain
ZNF251	Zinc finger protein 251
PRDM15	PR domain zinc finger protein 15
SF3B1	Splicing factor 3B subunit 1
DCLRE1A	DNA cross-link repair 1A protein
SMARCE1	SWI/SNF-related matrix-associated actin-dependent regulator of chromatin subfamily E member 1
GLYR1	Putative oxidoreductase GLYR1
TAF1	Transcription initiation factor TFIID subunit 1
MYC	Myc proto-oncogene protein
DDX42	ATP-dependent RNA helicase DDX42
ZBTB4	Zinc finger and BTB domain-containing protein 4
PGBD1	PiggyBac transposable element-derived protein 1
RNF40	E3 ubiquitin-protein ligase BRE1B
ZNF567	Zinc finger protein 567
SCML2	Sex comb on midleg-like protein 2
ZNF770	Zinc finger protein 770
RALY	RNA-binding protein Raly
ZNF202	Zinc finger protein 202
RBM4	RNA-binding protein 4
ZBTB8A	Zinc finger and BTB domain-containing protein 8A
ZNF398	Zinc finger protein 398
LCOR	Ligand-dependent corepressor
FOXP4	Forkhead box protein P4
HNRNPK	Heterogeneous nuclear ribonucleoprotein K
RSL1D1	Ribosomal L1 domain-containing protein 1
PPIL4	Peptidyl-prolyl cis-trans isomerase-like 4
TFAP2A	Transcription factor AP-2-alpha
PRPF40B	Pre-mRNA-processing factor 40 homolog B
FOS	Proto-oncogene c-Fos
SAFB	Scaffold attachment factor B1
USP13	Ubiquitin carboxyl-terminal hydrolase 13
FLYWCH1	FLYWCH-type zinc finger-containing protein 1
GNL3	Guanine nucleotide-binding protein-like 3
NELFE	Negative elongation factor E
ATF7IP	Activating transcription factor 7-interacting protein 1
ZNF668	Zinc finger protein 668
RBM19	Probable RNA-binding protein 19
SETD2	Histone-lysine N-methyltransferase SETD2
EPB41L2	Band 4.1-like protein 2
CHAF1A	Chromatin assembly factor 1 subunit A
CCAR2	Cell cycle and apoptosis regulator protein 2
COIL	Coilin
BANP	Protein BANP
LARP1	La-related protein 1
KDM1A	Lysine-specific histone demethylase 1A
CASZ1	Zinc finger protein castor homolog 1
RBBP6	E3 ubiquitin-protein ligase RBBP6
KRT2	Keratin, type II cytoskeletal 2 epidermal
IRF2	Interferon regulatory factor 2
CREB5	Cyclic AMP-responsive element-binding protein 5
ATF4	Cyclic AMP-dependent transcription factor ATF-4
NSMCE2	E3 SUMO-protein ligase NSE2
CREB3L1	Cyclic AMP-responsive element-binding protein 3-like protein 1;Processed cyclic AMP-responsive element-binding protein 3-like protein 1
DDX17	Probable ATP-dependent RNA helicase DDX17
NOL8	Nucleolar protein 8
MAP4	Microtubule-associated protein;Microtubule-associated protein 4
HSPA1B;HSPA1A	Heat shock 70 kDa protein 1B;Heat shock 70 kDa protein 1A
TARDBP	TAR DNA-binding protein 43
NOP56	Nucleolar protein 56
KDM5A	Lysine-specific demethylase 5A
POGZ	Pogo transposable element with ZNF domain
SAMD11	Sterile alpha motif domain-containing protein 11
ZMYM5	Zinc finger MYM-type protein 5
ETV4	ETS translocation variant 4
SARNP	SAP domain-containing ribonucleoprotein
PHC2	Polyhomeotic-like protein 2
ERF	ETS domain-containing transcription factor ERF
HIST2H3A;HIST1H3A;HIST3H3	Histone H3.2;Histone H3.1;Histone H3.1t
ZNF467	Zinc finger protein 467
RPL7A	60S ribosomal protein L7a
EIF4A1	Eukaryotic initiation factor 4A-I
TTC14	Tetratricopeptide repeat protein 14
ZNF283	Zinc finger protein 283
RBM17	Splicing factor 45
PUF60	Poly(U)-binding-splicing factor PUF60
HIST1H2BI;HIST1H2BC	Histone H2B;Histone H2B type 1-C/E/F/G/I
HNRNPA0	Heterogeneous nuclear ribonucleoprotein A0
ZBTB34	Zinc finger and BTB domain-containing protein 34
ZNF473	Zinc finger protein 473
ZNF436	Zinc finger protein 436
NPAT	Protein NPAT
RSRC2	Arginine/serine-rich coiled-coil protein 2
FNBP4	Formin-binding protein 4
ERCC6	DNA excision repair protein ERCC-6
ING3	Inhibitor of growth protein;Inhibitor of growth protein 3
RPL18A	60S ribosomal protein L18a
ZNF638	Zinc finger protein 638
SYMPK	Symplekin
JMJD1C	Probable JmjC domain-containing histone demethylation protein 2C
WDR3	WD repeat-containing protein 3
ZNF776	Zinc finger protein 776
UHRF1	E3 ubiquitin-protein ligase UHRF1
DPF1	Zinc finger protein neuro-d4
ZNF84	Zinc finger protein 84
POLDIP3	Polymerase delta-interacting protein 3
RBBP7	Histone-binding protein RBBP7
DCTN4	Dynactin subunit 4
C14orf93	Uncharacterized protein C14orf93
FUBP3	Far upstream element-binding protein 3
SIX4	Homeobox protein SIX4
NHP2	H/ACA ribonucleoprotein complex subunit 2
ALKBH5	RNA demethylase ALKBH5
ZNF417	Zinc finger protein 417
DDX19A;DDX19B	ATP-dependent RNA helicase DDX19A;ATP-dependent RNA helicase DDX19B
ZNF3	Zinc finger protein 3
DYRK1A	Dual specificity tyrosine-phosphorylation-regulated kinase 1A
TOR1AIP1	Torsin-1A-interacting protein 1
FIP1L1	Pre-mRNA 3-end-processing factor FIP1
RBMX2	RNA-binding motif protein, X-linked 2
NSUN2	tRNA (cytosine(34)-C(5))-methyltransferase
HDAC2	Histone deacetylase 2
MFAP1	Microfibrillar-associated protein 1
SAMHD1	Deoxynucleoside triphosphate triphosphohydrolase SAMHD1
NSRP1;CCDC55	Nuclear speckle splicing regulatory protein 1
SAP30BP	SAP30-binding protein
KLF3	Krueppel-like factor 3
TFAP4	Transcription factor AP-4
MRE11A	Double-strand break repair protein MRE11A
CBX5	Chromobox protein homolog 5
PRDM11	PR domain-containing protein 11;PR domain-containing protein 11 (Fragment)
JDP2	Jun dimerization protein 2
FIGNL1	Fidgetin-like protein 1
KRR1	KRR1 small subunit processome component homolog
BHLHE41	Class E basic helix-loop-helix protein 41
CIR1	Corepressor interacting with RBPJ 1
BBX	HMG box transcription factor BBX
BRD1	Bromodomain-containing protein 1
PES1	Pescadillo homolog
CCNL1	Cyclin-L1
GLI3	Transcriptional activator GLI3;Transcriptional repressor GLI3R
HNRNPF	Heterogeneous nuclear ribonucleoprotein F;Heterogeneous nuclear ribonucleoprotein F, N-terminally processed
ZNF658;ZNF658B	Zinc finger protein 658;Zinc finger protein 658B
FOXP1	Forkhead box protein P1
POLD1	DNA polymerase;DNA polymerase delta catalytic subunit
LLPH	Protein LLP homolog
ZNF841	Zinc finger protein 841
KLF5	Krueppel-like factor 5
KIAA1551	Uncharacterized protein KIAA1551
KMT2D	Histone-lysine N-methyltransferase 2D
ANAPC4	Anaphase-promoting complex subunit 4
RPS3	40S ribosomal protein S3
ZNF146	Zinc finger protein OZF
CBX2	Chromobox protein homolog 2
RPS3A	40S ribosomal protein S3a
KRT5	Keratin, type II cytoskeletal 5
SMCHD1	Structural maintenance of chromosomes flexible hinge domain-containing protein 1
ZNF639	Zinc finger protein 639
LMNB2	Lamin-B2
LDHA	L-lactate dehydrogenase A chain
NSD1	Histone-lysine N-methyltransferase, H3 lysine-36 and H4 lysine-20 specific
PRICKLE3	Prickle-like protein 3
ZNF205	Zinc finger protein 205
CDC23	Cell division cycle protein 23 homolog
PKM	Pyruvate kinase PKM;Pyruvate kinase
TADA3	Transcriptional adapter 3
EEF1A1;EEF1A1P5	Elongation factor 1-alpha 1;Putative elongation factor 1-alpha-like 3;Elongation factor 1-alpha
DDX39A	ATP-dependent RNA helicase DDX39A
RPL4	60S ribosomal protein L4
TRA2A	Transformer-2 protein homolog alpha
ZNF133	Zinc finger protein 133
STAT1	Signal transducer and activator of transcription 1-alpha/beta
CDK13	Cyclin-dependent kinase 13
NKRF	NF-kappa-B-repressing factor
PHC3	Polyhomeotic-like protein 3
WDR33	pre-mRNA 3 end processing protein WDR33
FXR1	Fragile X mental retardation syndrome-related protein 1
NAF1	H/ACA ribonucleoprotein complex non-core subunit NAF1
RBM26	RNA-binding protein 26
IKZF5	Zinc finger protein Pegasus
ZNF187;ZSCAN26	Zinc finger and SCAN domain-containing protein 26
KIF18A	Kinesin-like protein KIF18A
RPL26	60S ribosomal protein L26
MSANTD2	Myb/SANT-like DNA-binding domain-containing protein 2
CBX1	Chromobox protein homolog 1
ZBTB11	Zinc finger and BTB domain-containing protein 11
WRN	Werner syndrome ATP-dependent helicase
CCT6A	T-complex protein 1 subunit zeta
TAF3	Transcription initiation factor TFIID subunit 3
ZNF480	Zinc finger protein 480
EME1	Crossover junction endonuclease EME1
IKZF3	Zinc finger protein Aiolos
ZNF629	Zinc finger protein 629
KIAA1958	Uncharacterized protein KIAA1958
MIER1	Mesoderm induction early response protein 1
SUV420H1	Histone-lysine N-methyltransferase SUV420H1
LIN54	Protein lin-54 homolog
MEPCE	7SK snRNA methylphosphate capping enzyme
SF3A2	Splicing factor 3A subunit 2
IKZF2;ZNFN1A2	Zinc finger protein Helios
IRF2BP1	Interferon regulatory factor 2-binding protein 1
CHAMP1	Chromosome alignment-maintaining phosphoprotein 1
ZNF302	Zinc finger protein 302
RANBP1	Ran-specific GTPase-activating protein
LARP7	La-related protein 7
MPHOSPH6	M-phase phosphoprotein 6
VGLL3	Transcription cofactor vestigial-like protein 3
ZNF74	Zinc finger protein 74
SNRPD2	Small nuclear ribonucleoprotein Sm D2
RAI1	Retinoic acid-induced protein 1
LYAR	Cell growth-regulating nucleolar protein
C10orf12	Uncharacterized protein C10orf12
CCT3	T-complex protein 1 subunit gamma
CDC73	Parafibromin
ZNF623	Zinc finger protein 623
ZNF420	Zinc finger protein 420
REXO4	RNA exonuclease 4
CTCF	Transcriptional repressor CTCF
RBM33	RNA-binding protein 33
ZMIZ1	Zinc finger MIZ domain-containing protein 1
THOC1	THO complex subunit 1
ZNF184	Zinc finger protein 184
ZNF112	Zinc finger protein 112
HP1BP3	Heterochromatin protein 1-binding protein 3
ZFP64	Zinc finger protein 64 homolog, isoforms 3 and 4;Zinc finger protein 64 homolog, isoforms 1 and 2
DHX8	ATP-dependent RNA helicase DHX8
REST	RE1-silencing transcription factor
HIPK2	Homeodomain-interacting protein kinase 2
TYMS	Thymidylate synthase
TNRC18	Trinucleotide repeat-containing gene 18 protein
CCT8	T-complex protein 1 subunit theta
FBL	rRNA 2-O-methyltransferase fibrillarin
PRPF3	U4/U6 small nuclear ribonucleoprotein Prp3
ARNTL	Aryl hydrocarbon receptor nuclear translocator-like protein 1
TERF2	Telomeric repeat-binding factor 2
HSPD1	60 kDa heat shock protein, mitochondrial
ZNF484	Zinc finger protein 484
ZNF225	Zinc finger protein 225
ECT2	Protein ECT2
PFDN6	Prefoldin subunit 6
YTHDC1	YTH domain-containing protein 1
DMAP1	DNA methyltransferase 1-associated protein 1
ETAA1	Ewings tumor-associated antigen 1
SIN3A	Paired amphipathic helix protein Sin3a
CHD1	Chromodomain-helicase-DNA-binding protein 1 (Fragment)
MTA2	Metastasis-associated protein MTA2
AUTS2	Autism susceptibility gene 2 protein
SLU7	Pre-mRNA-splicing factor SLU7
ZNF544	Zinc finger protein 544
ZNF532	Zinc finger protein 532
ZNF45	Zinc finger protein 45
MZF1	Myeloid zinc finger 1
FYTTD1	UAP56-interacting factor
CDCA7L	Cell division cycle-associated 7-like protein
FAM208A	Protein FAM208A
GTSE1	G2 and S phase-expressed protein 1
ZNF331	Zinc finger protein 331
TINF2	TERF1-interacting nuclear factor 2
DDX21	Nucleolar RNA helicase 2
ZFHX4	Zinc finger homeobox protein 4
SKIV2L2	Superkiller viralicidic activity 2-like 2
EBNA1BP2	Probable rRNA-processing protein EBP2
AHDC1	AT-hook DNA-binding motif-containing protein 1
CDC5L	Cell division cycle 5-like protein
ZNF143	Zinc finger protein 143
RUVBL1	RuvB-like 1
ILF3	Interleukin enhancer-binding factor 3
KDM5C	Lysine-specific demethylase 5C
C19orf68	Uncharacterized protein C19orf68
ZNF516	Zinc finger protein 516
RPL24	60S ribosomal protein L24
ZNF195	Zinc finger protein 195
CWC25	Pre-mRNA-splicing factor CWC25 homolog
DDX50	ATP-dependent RNA helicase DDX50
SMARCD2	SWI/SNF-related matrix-associated actin-dependent regulator of chromatin subfamily D member 2
AFF4	AF4/FMR2 family member 4
BUD13	BUD13 homolog
ZNF7	Zinc finger protein 7
ZNF397	Zinc finger protein 397
ATF3	Cyclic AMP-dependent transcription factor ATF-3
PCNA	Proliferating cell nuclear antigen
AHNAK2	Protein AHNAK2
CCNT2	Cyclin-T2
LRIF1	Ligand-dependent nuclear receptor-interacting factor 1
PAXBP1	PAX3- and PAX7-binding protein 1
UBE2I	SUMO-conjugating enzyme UBC9
ZNF587B	Zinc finger protein 587B
KIF22	Kinesin-like protein KIF22;Kinesin-like protein
PAPD5	Non-canonical poly(A) RNA polymerase PAPD5
ZFX;ZFY	Zinc finger X-chromosomal protein;Zinc finger Y-chromosomal protein
ZNF766	Zinc finger protein 766
SUPT5H	Transcription elongation factor SPT5
ENO1	Alpha-enolase
DLGAP5	Disks large-associated protein 5
PHF3	PHD finger protein 3
ZNF296	Zinc finger protein 296
QRICH1	Glutamine-rich protein 1
PAF1	RNA polymerase II-associated factor 1 homolog
MCM4	DNA replication licensing factor MCM4
POLR3F	DNA-directed RNA polymerase III subunit RPC6
DYNLL1	Dynein light chain 1, cytoplasmic
MAML1	Mastermind-like protein 1
INO80E	INO80 complex subunit E
ZNF337	Zinc finger protein 337
SMARCA4	Transcription activator BRG1
SENP6	Sentrin-specific protease 6
GTPBP4	Nucleolar GTP-binding protein 1
SRSF7	Serine/arginine-rich splicing factor 7
MYSM1	Histone H2A deubiquitinase MYSM1
ZNF707	Zinc finger protein 707
ZNF697	Zinc finger protein 697
ZBTB39	Zinc finger and BTB domain-containing protein 39
HNRNPH2	Heterogeneous nuclear ribonucleoprotein H2
L3MBTL3	Lethal(3)malignant brain tumor-like protein 3
MBD3	Methyl-CpG-binding domain protein 3
HIST1H4A	Histone H4
ZNF808	Zinc finger protein 808
SLFN5	Schlafen family member 5
ATF6	Cyclic AMP-dependent transcription factor ATF-6 alpha;Processed cyclic AMP-dependent transcription factor ATF-6 alpha
DNMT1	DNA (cytosine-5)-methyltransferase 1
HSPA8	Heat shock cognate 71 kDa protein
ZNF181	Zinc finger protein 181
TSPYL2	Testis-specific Y-encoded-like protein 2
SNRNP40	U5 small nuclear ribonucleoprotein 40 kDa protein
ZNF324B	Zinc finger protein 324B
U2AF2	Splicing factor U2AF 65 kDa subunit
ZNF174	Zinc finger protein 174
MLLT1	Protein ENL
BACH2	Transcription regulator protein BACH2
SUZ12	Polycomb protein SUZ12
NKAP	NF-kappa-B-activating protein
PCBP1	Poly(rC)-binding protein 1
BEND7	BEN domain-containing protein 7
MYBL1	Myb-related protein A
ZNF512	Zinc finger protein 512
ZNF160	Zinc finger protein 160
ACTL6A	Actin-like protein 6A
LUC7L3	Luc7-like protein 3
NUP98	Nuclear pore complex protein Nup98-Nup96;Nuclear pore complex protein Nup98;Nuclear pore complex protein Nup96
RPL8	60S ribosomal protein L8
DGCR8	Microprocessor complex subunit DGCR8
MCM7	DNA replication licensing factor MCM7
KRT16	Keratin, type I cytoskeletal 16
ANXA2;ANXA2P2	Annexin A2;Annexin;Putative annexin A2-like protein
DNMT3B	DNA (cytosine-5)-methyltransferase 3B
ZNF354C	Zinc finger protein 354C
RBM39	RNA-binding protein 39
IGF2BP3	Insulin-like growth factor 2 mRNA-binding protein 3
ZIC3	Zinc finger protein ZIC 3
PTBP1	Polypyrimidine tract-binding protein 1
KMT2B	Histone-lysine N-methyltransferase 2B
WDR5	WD repeat-containing protein 5
SAP30	Histone deacetylase complex subunit SAP30
ZNF165	Zinc finger protein 165
GSE1	Genetic suppressor element 1
VCP	Transitional endoplasmic reticulum ATPase
BRD9	Bromodomain-containing protein 9
MAFK	Transcription factor MafK
ZNF529	Zinc finger protein 529
EHMT2	Histone-lysine N-methyltransferase EHMT2
ATXN7	Ataxin-7
TRRAP	Transformation/transcription domain-associated protein
EIF5A;EIF5AL1	Eukaryotic translation initiation factor 5A-1;Eukaryotic translation initiation factor 5A;Eukaryotic translation initiation factor 5A-1-like
NBN	Nibrin
HLTF	Helicase-like transcription factor
SMARCB1	SWI/SNF-related matrix-associated actin-dependent regulator of chromatin subfamily B member 1
MSANTD3	Myb/SANT-like DNA-binding domain-containing protein 3
ZNF28	Zinc finger protein 28
ZNF845	Zinc finger protein 845
ZSCAN29	Zinc finger and SCAN domain-containing protein 29
KANSL2	KAT8 regulatory NSL complex subunit 2
MMTAG2	Multiple myeloma tumor-associated protein 2
DHX15	Pre-mRNA-splicing factor ATP-dependent RNA helicase DHX15
TDP1	Tyrosyl-DNA phosphodiesterase 1
NR3C1	Glucocorticoid receptor
ZBED4	Zinc finger BED domain-containing protein 4
HIST2H2AA3;HIST2H2AC	Histone H2A type 2-A;Histone H2A type 2-C
TSNAX;DISC1	Translin-associated protein X
RPL13	60S ribosomal protein L13
ZBTB40	Zinc finger and BTB domain-containing protein 40
RAD18	E3 ubiquitin-protein ligase RAD18
MLLT3	Protein AF-9
ZBTB3	Zinc finger and BTB domain-containing protein 3
SON	Protein SON
RARG	Retinoic acid receptor gamma
NOP2	Probable 28S rRNA (cytosine(4447)-C(5))-methyltransferase
SUPT16H	FACT complex subunit SPT16
MEAF6	Chromatin modification-related protein MEAF6
NR2C1	Nuclear receptor subfamily 2 group C member 1
RPL10	60S ribosomal protein L10
CHERP	Calcium homeostasis endoplasmic reticulum protein
ZNF284	Zinc finger protein 284
ARKL1;C18orf25	Uncharacterized protein C18orf25
FAF1	FAS-associated factor 1
NFATC2IP	NFATC2-interacting protein
SPACIA2;FAM122B	Protein FAM122B
KIF4A	Chromosome-associated kinesin KIF4A
VPS72	Vacuolar protein sorting-associated protein 72 homolog
COMMD3-BMI1;BMI1	Polycomb complex protein BMI-1
SP1	Transcription factor Sp1
PPIA	Peptidyl-prolyl cis-trans isomerase A;Peptidyl-prolyl cis-trans isomerase A, N-terminally processed;Peptidyl-prolyl cis-trans isomerase
ZNF518B	Zinc finger protein 518B
DHX9	ATP-dependent RNA helicase A
INTS9	Integrator complex subunit 9
CASC5	Protein CASC5
ZNF362	Zinc finger protein 362
SYNCRIP	Heterogeneous nuclear ribonucleoprotein Q
ZNF354A	Zinc finger protein 354A
HIPK3	Homeodomain-interacting protein kinase 3
MED6	Mediator of RNA polymerase II transcription subunit 6
ILF2	Interleukin enhancer-binding factor 2
SDCCAG3	Serologically defined colon cancer antigen 3
FBRS	Probable fibrosin-1
RPAP3	RNA polymerase II-associated protein 3
CFL1	Cofilin-1
KAT6A	Histone acetyltransferase KAT6A
NFIC	Nuclear factor 1 C-type
CDC2;CDK1	Cyclin-dependent kinase 1
ZBTB14	Zinc finger and BTB domain-containing protein 14
TMPO	Lamina-associated polypeptide 2, isoforms beta/gamma;Thymopoietin;Thymopentin
SCNM1	Sodium channel modifier 1
MAP7D1	MAP7 domain-containing protein 1
RPS9	40S ribosomal protein S9
ZBTB44	Zinc finger and BTB domain-containing protein 44
RPS4X	40S ribosomal protein S4, X isoform
UBXN7	UBX domain-containing protein 7
TCF7L2	Transcription factor 7-like 2
RPL10A	60S ribosomal protein L10a
ZFP90	Zinc finger protein 90 homolog
ZBTB26	Zinc finger and BTB domain-containing protein 26
TRIP10	Cdc42-interacting protein 4
ARMC6	Armadillo repeat-containing protein 6
INTS4	Integrator complex subunit 4
ZNF865	Zinc finger protein 865
RPS8	40S ribosomal protein S8
CDCA2	Cell division cycle-associated protein 2
JADE1	Protein Jade-1
HNRNPD	Heterogeneous nuclear ribonucleoprotein D0
ZSCAN12	Zinc finger and SCAN domain-containing protein 12
ZNF566	Zinc finger protein 566
WDR70	WD repeat-containing protein 70
TRAIP	E3 ubiquitin-protein ligase TRAIP
GEMIN5	Gem-associated protein 5
ERCC4	DNA repair endonuclease XPF
CRTC3	CREB-regulated transcription coactivator 3
DDX1	ATP-dependent RNA helicase DDX1
DIDO1	Death-inducer obliterator 1
ZNF549	Zinc finger protein 549
PRPF31	U4/U6 small nuclear ribonucleoprotein Prp31
HOXB9	Homeobox protein Hox-B9
EIF2S2	Eukaryotic translation initiation factor 2 subunit 2
ZNF121	Zinc finger protein 121
PABPC4	Polyadenylate-binding protein;Polyadenylate-binding protein 4
WDR43	WD repeat-containing protein 43
XPA	DNA repair protein complementing XP-A cells
XAGE1A	X antigen family member 1
DNAJC8	DnaJ homolog subfamily C member 8
WDHD1	WD repeat and HMG-box DNA-binding protein 1
TMPO	Lamina-associated polypeptide 2, isoform alpha;Thymopoietin;Thymopentin
ZNF627	Zinc finger protein 627
ARID2	AT-rich interactive domain-containing protein 2
DDX23	Probable ATP-dependent RNA helicase DDX23
ATXN2L	Ataxin-2-like protein
SNRNP200	U5 small nuclear ribonucleoprotein 200 kDa helicase
WBP11	WW domain-binding protein 11
ZNF711	Zinc finger protein 711
SUDS3	Sin3 histone deacetylase corepressor complex component SDS3
WDR75	WD repeat-containing protein 75
ZNF749	Zinc finger protein 749
ZKSCAN3	Zinc finger protein with KRAB and SCAN domains 3
PHF13	PHD finger protein 13
ZNF446	Zinc finger protein 446
HOXC11	Homeobox protein Hox-C11
SLC4A1AP	Kanadaptin
SUPT3H	Transcription initiation protein SPT3 homolog
ELF4	ETS-related transcription factor Elf-4
RRS1	Ribosome biogenesis regulatory protein homolog
HSP90AB1	Heat shock protein HSP 90-beta
PRPF18	Pre-mRNA-splicing factor 18
GNL2	Nucleolar GTP-binding protein 2
HMGN5	High mobility group nucleosome-binding domain-containing protein 5
HCFC1	Host cell factor 1;HCF N-terminal chain 1;HCF N-terminal chain 2;HCF N-terminal chain 3;HCF N-terminal chain 4;HCF N-terminal chain 5;HCF N-terminal chain 6;HCF C-terminal chain 1;HCF C-terminal chain 2;HCF C-terminal chain 3;HCF C-terminal chain 4;HCF C-terminal chain 5;HCF C-terminal chain 6
ANXA1	Annexin A1
HTATSF1	HIV Tat-specific factor 1
FOXF2	Forkhead box protein F2
ZSCAN5A	Zinc finger and SCAN domain-containing protein 5A
ZNF235	Zinc finger protein 235
KRT80	Keratin, type II cytoskeletal 80
ZFP30	Zinc finger protein 30 homolog
DDX3X	ATP-dependent RNA helicase DDX3X
ARHGAP23	Rho GTPase-activating protein 23
ASH1L	Histone-lysine N-methyltransferase ASH1L
BAZ1A	Bromodomain adjacent to zinc finger domain protein 1A
EXOSC2	Exosome complex component RRP4
MYO1B	Unconventional myosin-Ib
U2AF1	Splicing factor U2AF 35 kDa subunit
RNF168	E3 ubiquitin-protein ligase RNF168
PATZ1	POZ-, AT hook-, and zinc finger-containing protein 1
ZNF227	Zinc finger protein 227
DAXX	Death domain-associated protein 6
ZNF611	Zinc finger protein 611
HNRNPH1	Heterogeneous nuclear ribonucleoprotein H;Heterogeneous nuclear ribonucleoprotein H, N-terminally processed
ZNF664	Zinc finger protein 664
KRT7	Keratin, type II cytoskeletal 7
MAFF	Transcription factor MafF
STIP1	Stress-induced-phosphoprotein 1
FAM111A	Protein FAM111A
C11orf57	Uncharacterized protein C11orf57
ZNF343	Zinc finger protein 343
LAMB3	Laminin subunit beta-3
UBN2	Ubinuclein-2
TFAP2C	Transcription factor AP-2 gamma
DDX39B	Spliceosome RNA helicase DDX39B
HDAC4	Histone deacetylase 4
RPS18	40S ribosomal protein S18
PARP14	Poly [ADP-ribose] polymerase 14
IRF2BPL	Interferon regulatory factor 2-binding protein-like
ZBTB7A	Zinc finger and BTB domain-containing protein 7A
IKZF4	Zinc finger protein Eos
C19orf47	Uncharacterized protein C19orf47
ZNF234	Zinc finger protein 234
RP9	Retinitis pigmentosa 9 protein
NOVA2	RNA-binding protein Nova-2
SQSTM1	Sequestosome-1
ANXA5	Annexin A5;Annexin
ZNF680	Zinc finger protein 680
G3BP1	Ras GTPase-activating protein-binding protein 1
SMTN	Smoothelin
PDE3A	cGMP-inhibited 3,5-cyclic phosphodiesterase A
CLSPN	Claspin
IMPDH2	Inosine-5-monophosphate dehydrogenase 2
ASUN	Protein asunder homolog
ZNF280B	Zinc finger protein 280B
RPL11	60S ribosomal protein L11
NCAPH	Condensin complex subunit 2
CSTF2	Cleavage stimulation factor subunit 2
CENPT	Centromere protein T
MTF2	Metal-response element-binding transcription factor 2
SSRP1	FACT complex subunit SSRP1
ZNF419	Zinc finger protein 419
VRK1	Serine/threonine-protein kinase VRK1
CAPZA1	F-actin-capping protein subunit alpha-1
FLNA	Filamin-A
NFIX	Nuclear factor 1;Nuclear factor 1 X-type
ZNF346	Zinc finger protein 346
CDCA7	Cell division cycle-associated protein 7
HSPA5	78 kDa glucose-regulated protein
EMSY	Protein EMSY
GPKOW	G patch domain and KOW motifs-containing protein
SOBP	Sine oculis-binding protein homolog
ZSCAN9	Zinc finger and SCAN domain-containing protein 9
SRSF1	Serine/arginine-rich splicing factor 1
CPSF2	Cleavage and polyadenylation specificity factor subunit 2
SHPRH	E3 ubiquitin-protein ligase SHPRH
KDM4A	Lysine-specific demethylase 4A
PSMD12	26S proteasome non-ATPase regulatory subunit 12
KCTD15	BTB/POZ domain-containing protein KCTD15
FAM208B	Protein FAM208B
C1D	Nuclear nucleic acid-binding protein C1D
ZNF561	Zinc finger protein 561
CDCA8	Borealin
PRDX1	Peroxiredoxin-1
DDX54	ATP-dependent RNA helicase DDX54
ZNF354B	Zinc finger protein 354B
TUBA1B	Tubulin alpha-1B chain
KDM3B	Lysine-specific demethylase 3B
ZNF430	Zinc finger protein 430
USP22	Ubiquitin carboxyl-terminal hydrolase 22
SMARCA1	Probable global transcription activator SNF2L1
GLI2	Zinc finger protein GLI2
PHF10	PHD finger protein 10
ZSCAN22	Zinc finger and SCAN domain-containing protein 22
CDC7	Cell division cycle 7-related protein kinase
ZNF131	Zinc finger protein 131
C11orf95	Uncharacterized protein C11orf95
ZNF76	Zinc finger protein 76
CTNND1	Catenin delta-1
CHD1L	Chromodomain-helicase-DNA-binding protein 1-like
BRMS1	Breast cancer metastasis-suppressor 1
GPATCH2L	G patch domain-containing protein 2-like
ZNF16	Zinc finger protein 16
MED7	Mediator of RNA polymerase II transcription subunit 7
RAD21	Double-strand-break repair protein rad21 homolog
RACGAP1	Rac GTPase-activating protein 1
KANSL1L	KAT8 regulatory NSL complex subunit 1-like protein
SKIDA1	SKI/DACH domain-containing protein 1
PCGF6	Polycomb group RING finger protein 6
LIMA1	LIM domain and actin-binding protein 1
ZNF557	Zinc finger protein 557
RPS7	40S ribosomal protein S7
NOP16	Nucleolar protein 16
RBM22	Pre-mRNA-splicing factor RBM22
TKT	Transketolase
IQSEC1	IQ motif and SEC7 domain-containing protein 1
H2AFY	Core histone macro-H2A.1;Histone H2A
RBBP4	Histone-binding protein RBBP4
ZNF655	Zinc finger protein 655
RPS14	40S ribosomal protein S14
UTP3	Something about silencing protein 10
ZNF787	Zinc finger protein 787
ZNF574	Zinc finger protein 574
MITF	Microphthalmia-associated transcription factor
PHRF1	PHD and RING finger domain-containing protein 1
MED17	Mediator of RNA polymerase II transcription subunit 17
ZBTB48	Zinc finger and BTB domain-containing protein 48
GNL3L	Guanine nucleotide-binding protein-like 3-like protein
RUNX3	Runt-related transcription factor 3
TP73	Tumor protein p73
ZNF823	Zinc finger protein 823
ARL14EP	ARL14 effector protein
AHR	Aryl hydrocarbon receptor
ZXDC	Zinc finger protein ZXDC
TARS	Threonine--tRNA ligase, cytoplasmic
ZBTB6	Zinc finger and BTB domain-containing protein 6
RPS24	40S ribosomal protein S24
EYA4	Eyes absent homolog;Eyes absent homolog 4
ZFP82	Zinc finger protein 82 homolog
PRRC2C	Protein PRRC2C
ZRANB2	Zinc finger Ran-binding domain-containing protein 2
INTS10	Integrator complex subunit 10
MELK	Maternal embryonic leucine zipper kinase
ZHX2	Zinc fingers and homeoboxes protein 2
RPL23	60S ribosomal protein L23
NOMO2;NOMO3	Nodal modulator 2;Nodal modulator 3
KDM7A	Lysine-specific demethylase 7A
CPS1	Carbamoyl-phosphate synthase [ammonia], mitochondrial
ANP32E	Acidic leucine-rich nuclear phosphoprotein 32 family member E
ZNF860	Zinc finger protein 860
ZNF580	Zinc finger protein 580
ZNF548	Zinc finger protein 548
NCOA3	Nuclear receptor coactivator 3
ADD3	Gamma-adducin
SPTY2D1	Protein SPT2 homolog
SUGP2	SURP and G-patch domain-containing protein 2
CXorf23	Uncharacterized protein CXorf23
SYF2	Pre-mRNA-splicing factor SYF2
SPIN1	Spindlin-1
RRP7A	Ribosomal RNA-processing protein 7 homolog A
GPANK1	G patch domain and ankyrin repeat-containing protein 1
ODF2	Outer dense fiber protein 2
GLI1	Zinc finger protein GLI1
USP7	Ubiquitin carboxyl-terminal hydrolase 7;Ubiquitin carboxyl-terminal hydrolase
ATF7	Cyclic AMP-dependent transcription factor ATF-7
BCL9L	B-cell CLL/lymphoma 9-like protein
KAT2A	Histone acetyltransferase KAT2A
EZH2	Histone-lysine N-methyltransferase EZH2
SMAD4	Mothers against decapentaplegic homolog;Mothers against decapentaplegic homolog 4
KMT2A	Histone-lysine N-methyltransferase 2A;MLL cleavage product N320;MLL cleavage product C180
ARID5A	AT-rich interactive domain-containing protein 5A
SMC6	Structural maintenance of chromosomes protein 6
CFDP1	Craniofacial development protein 1
SNRNP35	U11/U12 small nuclear ribonucleoprotein 35 kDa protein
PRPF6	Pre-mRNA-processing factor 6
ZNF134	Zinc finger protein 134
SRFBP1	Serum response factor-binding protein 1
LRRC42	Leucine-rich repeat-containing protein 42
DGCR14	Protein DGCR14
PLEKHA5	Pleckstrin homology domain-containing family A member 5
ZNF552	Zinc finger protein 552
HCFC2	Host cell factor 2
MCM2	DNA replication licensing factor MCM2
MSH6	DNA mismatch repair protein Msh6
SRSF6	Serine/arginine-rich splicing factor 6
PA2G4	Proliferation-associated protein 2G4
SRRT	Serrate RNA effector molecule homolog
SPEN	Msx2-interacting protein
ZNF761	Zinc finger protein 761
ZNF426	Zinc finger protein 426
ZNF41	Zinc finger protein 41
EFTUD2	116 kDa U5 small nuclear ribonucleoprotein component
ZFR	Zinc finger RNA-binding protein
NUP214	Nuclear pore complex protein Nup214
PRKDC	DNA-dependent protein kinase catalytic subunit
NFATC1	Nuclear factor of activated T-cells, cytoplasmic 1
NACA	Nascent polypeptide-associated complex subunit alpha, muscle-specific form;Nascent polypeptide-associated complex subunit alpha
ZNF621	Zinc finger protein 621
USF1	Upstream stimulatory factor 1
MSH2	DNA mismatch repair protein Msh2
ZNF691	Zinc finger protein 691
RMI1	RecQ-mediated genome instability protein 1
SRSF11	Serine/arginine-rich splicing factor 11
NCOA1	Nuclear receptor coactivator 1
ANKRD32	Ankyrin repeat domain-containing protein 32
ELF2	ETS-related transcription factor Elf-2
GDI2	Rab GDP dissociation inhibitor beta
ARL6IP4	ADP-ribosylation factor-like protein 6-interacting protein 4
GTF3C4	General transcription factor 3C polypeptide 4
PRPF38A	Pre-mRNA-splicing factor 38A
TXNIP	Thioredoxin-interacting protein
HMGXB4	HMG domain-containing protein 4
EEF2	Elongation factor 2
CTNNA1	Catenin alpha-1
TBL2	Transducin beta-like protein 2
ZNF572	Zinc finger protein 572
SF3B6	Splicing factor 3B subunit 6
NVL	Nuclear valosin-containing protein-like
GNB2L1	Guanine nucleotide-binding protein subunit beta-2-like 1;Guanine nucleotide-binding protein subunit beta-2-like 1, N-terminally processed
HNRNPAB	Heterogeneous nuclear ribonucleoprotein A/B
FOXC1	Forkhead box protein C1
CCT2	T-complex protein 1 subunit beta
KIAA1586	Uncharacterized protein KIAA1586
CHD2	Chromodomain-helicase-DNA-binding protein 2
CCDC12	Coiled-coil domain-containing protein 12
MTBP	Mdm2-binding protein
TDP2	Tyrosyl-DNA phosphodiesterase 2
ZNF721	Zinc finger protein 721
RPS6KA4	Ribosomal protein S6 kinase;Ribosomal protein S6 kinase alpha-4
NKD2	Protein naked cuticle homolog 2
LIG1	DNA ligase 1;DNA ligase
KDM2A	Lysine-specific demethylase 2A
NOL7	Nucleolar protein 7
XRN2	5-3 exoribonuclease 2
NUP155	Nuclear pore complex protein Nup155
TBL3	Transducin beta-like protein 3
DDX51	ATP-dependent RNA helicase DDX51
ZNF431	Zinc finger protein 431
GLIS1	Zinc finger protein GLIS1
ZNF8	Zinc finger protein 8
NKD1	Protein naked cuticle homolog 1
ANLN	Actin-binding protein anillin
SMARCD1	SWI/SNF-related matrix-associated actin-dependent regulator of chromatin subfamily D member 1
ZNF182	Zinc finger protein 182
ZNF546	Zinc finger protein 546
ZNF689	Zinc finger protein 689
SNRNP70	U1 small nuclear ribonucleoprotein 70 kDa
FAM50A	Protein FAM50A
CTTN	Src substrate cortactin
RNPS1	RNA-binding protein with serine-rich domain 1
POLR2C	DNA-directed RNA polymerase II subunit RPB3
PCGF1	Polycomb group RING finger protein 1
NAT10	N-acetyltransferase 10
ALX1	ALX homeobox protein 1
CBFA2T2	Protein CBFA2T2
RPS17	40S ribosomal protein S17
WT1	Wilms tumor protein
CASP8AP2	CASP8-associated protein 2
ZNF330	Zinc finger protein 330
CD2AP	CD2-associated protein
RBM10	RNA-binding protein 10
HDGFRP2	Hepatoma-derived growth factor-related protein 2
ZFHX3	Zinc finger homeobox protein 3
NXF1	Nuclear RNA export factor 1
GMEB2	Glucocorticoid modulatory element-binding protein 2
RPS2	40S ribosomal protein S2
ZNF107	Zinc finger protein 107
LMO7	LIM domain only protein 7
MAK16	Protein MAK16 homolog
ZNF783	Protein ZNF783
WRNIP1	ATPase WRNIP1
PHF8	Histone lysine demethylase PHF8
IGF2BP2	Insulin-like growth factor 2 mRNA-binding protein 2
CENPH	Centromere protein H
PCBP2	Poly(rC)-binding protein 2
RNF219	RING finger protein 219
DCAF13	DDB1- and CUL4-associated factor 13
DUSP11	RNA/RNP complex-1-interacting phosphatase
ZNF564	Zinc finger protein 564
INO80D	INO80 complex subunit D
PCGF2	Polycomb group RING finger protein 2
TXNRD1	Thioredoxin reductase 1, cytoplasmic
ZNF81	Zinc finger protein 81
CEBPA	CCAAT/enhancer-binding protein alpha
ZNF136	Zinc finger protein 136
DHFR	Dihydrofolate reductase
RPL5	60S ribosomal protein L5
ZBTB18	Zinc finger and BTB domain-containing protein 18
CLK3	Dual specificity protein kinase CLK3
POMP	Proteasome maturation protein
MED8	Mediator of RNA polymerase II transcription subunit 8
TFPT	TCF3 fusion partner
TEAD4	Transcriptional enhancer factor TEF-3
RPN2	Dolichyl-diphosphooligosaccharide--protein glycosyltransferase subunit 2
PDE4D	cAMP-specific 3,5-cyclic phosphodiesterase 4D
DSCC1	Sister chromatid cohesion protein DCC1
PTGES3	Prostaglandin E synthase 3
GFP	GFP-like fluorescent chromoprotein FP506
ZNF579	Zinc finger protein 579
FBN1	Fibrillin-1
CDC20	Cell division cycle protein 20 homolog
SCAF1	Splicing factor, arginine/serine-rich 19
TUBB	Tubulin beta chain
GTF3C2	General transcription factor 3C polypeptide 2
ZNF585B	Zinc finger protein 585B
DBF4	Protein DBF4 homolog A
ZNF317	Zinc finger protein 317
E2F7	Transcription factor E2F7
ELK4	ETS domain-containing protein Elk-4
YEATS4	YEATS domain-containing protein 4
CALD1	Caldesmon
CSNK2A1;CSNK2A3	Casein kinase II subunit alpha;Casein kinase II subunit alpha 3
DCLRE1B	5 exonuclease Apollo
ZNF217	Zinc finger protein 217
PPRC1	Peroxisome proliferator-activated receptor gamma coactivator-related protein 1
ZNF765	Zinc finger protein 765
EXOSC3	Exosome complex component RRP40
GOPC	Golgi-associated PDZ and coiled-coil motif-containing protein
MBD1	Methyl-CpG-binding domain protein 1 (Fragment)
TOMM34	Mitochondrial import receptor subunit TOM34
SP140L	Nuclear body protein SP140-like protein
MEF2D	Myocyte-specific enhancer factor 2D
CTBP2	C-terminal-binding protein 2
ACD	Adrenocortical dysplasia protein homolog
PSMA5	Proteasome subunit alpha type-5
SRSF3	Serine/arginine-rich splicing factor 3
CEP95	Centrosomal protein of 95 kDa
ZNF319	Zinc finger protein 319
CRTC2	CREB-regulated transcription coactivator 2
PPM1D	Protein phosphatase 1D
RCOR2	REST corepressor 2
SMAP;C11orf58	Small acidic protein
ASXH1;ASXL1	Putative Polycomb group protein ASXL1
RBM8A	RNA-binding protein 8A
RPS11	40S ribosomal protein S11
TET2	Methylcytosine dioxygenase TET2
SIRT6	NAD-dependent protein deacetylase sirtuin-6
KAT6B	Histone acetyltransferase KAT6B
LPIN1	Phosphatidate phosphatase LPIN1
ZSCAN23	Zinc finger and SCAN domain-containing protein 23
MARCH7	E3 ubiquitin-protein ligase MARCH7
ZSCAN2	Zinc finger and SCAN domain-containing protein 2
ATF1	Cyclic AMP-dependent transcription factor ATF-1
LDHB	L-lactate dehydrogenase B chain;L-lactate dehydrogenase
DDB1	DNA damage-binding protein 1
ZCCHC8	Zinc finger CCHC domain-containing protein 8
HMGB1;HMGB1P1	High mobility group protein B1;Putative high mobility group protein B1-like 1
LIN9	Protein lin-9 homolog
RBM28	RNA-binding protein 28
SEH1L	Nucleoporin SEH1
ZNF347	Zinc finger protein 347
MTHFD2	Bifunctional methylenetetrahydrofolate dehydrogenase/cyclohydrolase, mitochondrial;NAD-dependent methylenetetrahydrofolate dehydrogenase;Methenyltetrahydrofolate cyclohydrolase
MRGBP	MRG/MORF4L-binding protein
ZNF408	Zinc finger protein 408
MAT2A	S-adenosylmethionine synthase isoform type-2
SNRNP48	U11/U12 small nuclear ribonucleoprotein 48 kDa protein
ZNF226	Zinc finger protein 226
FBN2	Fibrillin-2
PSMC1	26S protease regulatory subunit 4
AURKA	Aurora kinase A
CDC25B	M-phase inducer phosphatase 2
TRA2B	Transformer-2 protein homolog beta
MTA1	Metastasis-associated protein MTA1
ZNF71	Endothelial zinc finger protein induced by tumor necrosis factor alpha
ZNF791	Zinc finger protein 791
CITED2	Cbp/p300-interacting transactivator 2
MSL3	Male-specific lethal 3 homolog
RBM5	RNA-binding protein 5
FUS	RNA-binding protein FUS
CXXC1	CXXC-type zinc finger protein 1
RPL17;RPL17-C18orf32	60S ribosomal protein L17
PHC1	Polyhomeotic-like protein 1
RPSA	40S ribosomal protein SA
PPIL2	Peptidyl-prolyl cis-trans isomerase-like 2
ZNF214	Zinc finger protein 214
MYB;c-myb	Transcriptional activator Myb
SLBP	Histone RNA hairpin-binding protein
PSMD3	26S proteasome non-ATPase regulatory subunit 3
DDX10	Probable ATP-dependent RNA helicase DDX10
POLK	DNA polymerase kappa
UCHL5	Ubiquitin carboxyl-terminal hydrolase;Ubiquitin carboxyl-terminal hydrolase isozyme L5
SBNO2	Protein strawberry notch homolog 2
RPS19BP1	Active regulator of SIRT1
YWHAE	14-3-3 protein epsilon
TPM3;DKFZp686J1372	Tropomyosin alpha-3 chain
ZNF440	Zinc finger protein 440
MVP	Major vault protein
AKAP8	A-kinase anchor protein 8
SAGE1	Sarcoma antigen 1
NUP93	Nuclear pore complex protein Nup93
USP1	Ubiquitin carboxyl-terminal hydrolase 1
RBFOX2;RBFOX1	RNA binding protein fox-1 homolog 2;RNA binding protein fox-1 homolog;RNA binding protein fox-1 homolog 1
EPC1	Enhancer of polycomb homolog 1
MAD1L1	Mitotic spindle assembly checkpoint protein MAD1
NSL1	Kinetochore-associated protein NSL1 homolog
ZNF624	Zinc finger protein 624
MCM3	DNA replication licensing factor MCM3
CIRH1A	Cirhin
USP28	Ubiquitin carboxyl-terminal hydrolase 28;Ubiquitin carboxyl-terminal hydrolase
ZNF784	Zinc finger protein 784
CSNK2B	Casein kinase II subunit beta
CUL4A	Cullin-4A
DBP	D site-binding protein
HNRNPDL	Heterogeneous nuclear ribonucleoprotein D-like
PSMD4	26S proteasome non-ATPase regulatory subunit 4
ZDBF2	DBF4-type zinc finger-containing protein 2
YWHAZ	14-3-3 protein zeta/delta
E2F6	Transcription factor E2F6
PALMD	Palmdelphin
FANCI	Fanconi anemia group I protein
DUS3L	tRNA-dihydrouridine(47) synthase [NAD(P)(+)]-like
RXRA	Retinoic acid receptor RXR-alpha
RPL6	60S ribosomal protein L6
MYEF2	Myelin expression factor 2
MSX1	Homeobox protein MSX-1
ZNF740	Zinc finger protein 740
CDKN2AIP	CDKN2A-interacting protein
SPATA5	Spermatogenesis-associated protein 5
RPL35	60S ribosomal protein L35
NUP153	Nuclear pore complex protein Nup153
ZFP64	Zinc finger protein 64 homolog, isoforms 3 and 4
SRGAP2B	SLIT-ROBO Rho GTPase-activating protein 2B
TSR1	Pre-rRNA-processing protein TSR1 homolog
CDK5RAP3	CDK5 regulatory subunit-associated protein 3
MECOM	MDS1 and EVI1 complex locus protein EVI1 (Fragment)
SNRPD1	Small nuclear ribonucleoprotein Sm D1
ELK3	ETS domain-containing protein Elk-3
CENPB	Major centromere autoantigen B
UTP6	U3 small nucleolar RNA-associated protein 6 homolog
GATAD1	GATA zinc finger domain-containing protein 1
DCUN1D4	DCN1-like protein 4;DCN1-like protein
TBX3	T-box transcription factor TBX3
SIRT1	NAD-dependent protein deacetylase sirtuin-1;SirtT1 75 kDa fragment
KAT7	Histone acetyltransferase KAT7
ZNF594	Zinc finger protein 594
ZNF662	Zinc finger protein 662
HSPB1	Heat shock protein beta-1
ZNF500	Zinc finger protein 500
PIK3R3	Phosphatidylinositol 3-kinase regulatory subunit gamma
ASPM	Abnormal spindle-like microcephaly-associated protein
PDCD11	Protein RRP5 homolog
BRIP1	Fanconi anemia group J protein
DSTN	Destrin
SREBF2	Sterol regulatory element-binding protein 2;Processed sterol regulatory element-binding protein 2
FEN1	Flap endonuclease 1
AKAP17A	A-kinase anchor protein 17A
PHF6	PHD finger protein 6
RPS15	40S ribosomal protein S15
RCC2	Protein RCC2
ZNF771	Zinc finger protein 771
RPS5	40S ribosomal protein S5;40S ribosomal protein S5, N-terminally processed
TSPYL1	Testis-specific Y-encoded-like protein 1
MUS81	Crossover junction endonuclease MUS81
ZNF23	Zinc finger protein 23
ZNF169	Zinc finger protein 169
P4HA2	Prolyl 4-hydroxylase subunit alpha-2
AURKB	Aurora kinase B
ARNT	Aryl hydrocarbon receptor nuclear translocator
EIF2S3;EIF2S3L	Eukaryotic translation initiation factor 2 subunit 3;Putative eukaryotic translation initiation factor 2 subunit 3-like protein
CSRP2BP	Cysteine-rich protein 2-binding protein
CHD6	Chromodomain-helicase-DNA-binding protein 6
PPIG	Peptidyl-prolyl cis-trans isomerase G
RBM45	RNA-binding protein 45
SND1	Staphylococcal nuclease domain-containing protein 1
PRPF8	Pre-mRNA-processing-splicing factor 8
AATF	Protein AATF
MKX	Homeobox protein Mohawk
DDX47	Probable ATP-dependent RNA helicase DDX47
DROSHA	Ribonuclease 3
NFE2L2	Nuclear factor erythroid 2-related factor 2
BCAR2;TRERF1	Transcriptional-regulating factor 1
SMN1;SMN2	Survival motor neuron protein
CMPK1	UMP-CMP kinase
ZNF322	Zinc finger protein 322
PSMD8	26S proteasome non-ATPase regulatory subunit 8
ZNF33B	Zinc finger protein 33B
RAVER1	Ribonucleoprotein PTB-binding 1
PSMD11	26S proteasome non-ATPase regulatory subunit 11
KRT86;KRT87P	Keratin, type II cuticular Hb6;Putative keratin-87 protein
RPL34	60S ribosomal protein L34
MKNK2	MAP kinase-interacting serine/threonine-protein kinase 2
ZFPM2	Zinc finger protein ZFPM2
RNF2	E3 ubiquitin-protein ligase RING2
RAB7A	Ras-related protein Rab-7a
MACROD1	O-acetyl-ADP-ribose deacetylase MACROD1
MBD2	Methyl-CpG-binding domain protein 2
C15orf39	Uncharacterized protein C15orf39
WDR74	WD repeat-containing protein 74
ASNS	Asparagine synthetase [glutamine-hydrolyzing]
DDX11;DDX12P	Probable ATP-dependent RNA helicase DDX11;Putative ATP-dependent RNA helicase DDX12
CCT7	T-complex protein 1 subunit eta
SHB	SH2 domain-containing adapter protein B
CBLL1	E3 ubiquitin-protein ligase Hakai
PROX1	Prospero homeobox protein 1
THAP11	THAP domain-containing protein 11
PPARGC1A	Peroxisome proliferator-activated receptor gamma coactivator 1-alpha
SMC5	Structural maintenance of chromosomes protein 5
C1orf43	Uncharacterized protein C1orf43
ZFP36L1	Zinc finger protein 36, C3H1 type-like 1
ASXL2	Putative Polycomb group protein ASXL2
SRSF2	Serine/arginine-rich splicing factor 2
RPL28	60S ribosomal protein L28
SPECC1	Cytospin-B
LIN37	Protein lin-37 homolog
CCDC112	Coiled-coil domain-containing protein 112
ZNF525	HCG1787564;Putative zinc finger protein 702;Zinc finger protein 468;Zinc finger protein 525;Zinc finger protein 578;Zinc finger protein 600;Zinc finger protein 610;Zinc finger protein 765;Zinc finger protein 808;Zinc finger protein 860
RPL18	60S ribosomal protein L18
CBX8	Chromobox protein homolog 8
HNRNPUL2-BSCL2;HNRNPUL2	Heterogeneous nuclear ribonucleoprotein U-like protein 2
TAF15	TATA-binding protein-associated factor 2N
KIF18B	Kinesin-like protein KIF18B;Kinesin-like protein
AKR1C2	Aldo-keto reductase family 1 member C2
TICRR	Treslin
MORC4	MORC family CW-type zinc finger protein 4
SPICE1	Spindle and centriole-associated protein 1
SLK	STE20-like serine/threonine-protein kinase
REV1	DNA repair protein REV1
BRPF3	Bromodomain and PHD finger-containing protein 3
RBM34	RNA-binding protein 34
ZNF551	Zinc finger protein 551
MIDN	Midnolin
GATA2	Endothelial transcription factor GATA-2
RFX7	DNA-binding protein RFX7
NAB1	NGFI-A-binding protein 1 (Fragment)
SMC4	Structural maintenance of chromosomes protein;Structural maintenance of chromosomes protein 4
EZH1	Histone-lysine N-methyltransferase EZH1
FRMD4B	FERM domain-containing protein 4B
RNF220	E3 ubiquitin-protein ligase RNF220
SIMC1	SUMO-interacting motif-containing protein 1
MKL2	MKL/myocardin-like protein 2
THEGL	Testicular haploid expressed gene protein-like
BRCA2	Breast cancer type 2 susceptibility protein
CCDC77	Coiled-coil domain-containing protein 77
PSIP1	PC4 and SFRS1-interacting protein
ERCC1	DNA excision repair protein ERCC-1
NDUFA13	NADH dehydrogenase [ubiquinone] 1 alpha subcomplex subunit 13
GINS2	DNA replication complex GINS protein PSF2
MASTL	Serine/threonine-protein kinase greatwall
MIS18A	Protein Mis18-alpha
ZNF543	Zinc finger protein 543
NFKB2	Nuclear factor NF-kappa-B p100 subunit;Nuclear factor NF-kappa-B p52 subunit
ADSL	Adenylosuccinate lyase
ZNF367	Zinc finger protein 367
ZBTB17	Zinc finger and BTB domain-containing protein 17
KLF10	Krueppel-like factor 10
GRN	Granulins;Acrogranin;Paragranulin;Granulin-1;Granulin-2;Granulin-3;Granulin-4;Granulin-5;Granulin-6;Granulin-7
RRP36	Ribosomal RNA processing protein 36 homolog
ORC6	Origin recognition complex subunit 6
C5orf42	Uncharacterized protein C5orf42
NEIL3	Endonuclease 8-like 3
ALDOA	Fructose-bisphosphate aldolase A;Fructose-bisphosphate aldolase
LSM11	U7 snRNA-associated Sm-like protein LSm11
NOL9	Polynucleotide 5-hydroxyl-kinase NOL9
C8orf76;ZHX1-C8orf76	Uncharacterized protein C8orf76;Zinc fingers and homeoboxes protein 1, isoform 2
CAST	Calpastatin
ZNF813	Zinc finger protein 813
FTO	Alpha-ketoglutarate-dependent dioxygenase FTO
DNAH14	Dynein heavy chain 14, axonemal
TAF6	Transcription initiation factor TFIID subunit 6
PWWP2A	PWWP domain-containing protein 2A
ELL2	RNA polymerase II elongation factor ELL2
ATF6B	Cyclic AMP-dependent transcription factor ATF-6 beta;Processed cyclic AMP-dependent transcription factor ATF-6 beta
VCPIP1	Deubiquitinating protein VCIP135
DVL2	Segment polarity protein dishevelled homolog DVL-2
C9orf78	Uncharacterized protein C9orf78
BASP1	Brain acid soluble protein 1
BCAS3	Breast carcinoma-amplified sequence 3
AR	Androgen receptor
TPI1	Triosephosphate isomerase
BRPF1	Peregrin
ZRSR2;ZRSR1	U2 small nuclear ribonucleoprotein auxiliary factor 35 kDa subunit-related protein 2;U2 small nuclear ribonucleoprotein auxiliary factor 35 kDa subunit-related protein 1
FAM207A	Protein FAM207A
ZNF239	Zinc finger protein 239
RPA1	Replication protein A 70 kDa DNA-binding subunit;Replication protein A 70 kDa DNA-binding subunit, N-terminally processed
FN1	Fibronectin;Anastellin;Ugl-Y1;Ugl-Y2;Ugl-Y3
PGAM1	Phosphoglycerate mutase 1
ZNF260	Zinc finger protein 260
KAT5	Histone acetyltransferase KAT5;Histone acetyltransferase
TDRD3	Tudor domain-containing protein 3
ZNF672	Zinc finger protein 672
CALU	Calumenin
APP	Amyloid beta A4 protein;N-APP;Soluble APP-alpha;Soluble APP-beta;C99;Beta-amyloid protein 42;Beta-amyloid protein 40;C83;P3(42);P3(40);C80;Gamma-secretase C-terminal fragment 59;Gamma-secretase C-terminal fragment 57;Gamma-secretase C-terminal fragment 50;C31
ZNF304	Zinc finger protein 304
RPL15	60S ribosomal protein L15;Ribosomal protein L15
RRP9	U3 small nucleolar RNA-interacting protein 2
LAMB1	Laminin subunit beta-1
HDAC7	Histone deacetylase 7;Histone deacetylase
CLK1	Dual specificity protein kinase CLK1
DAPK3	Death-associated protein kinase 3
C7orf31	Uncharacterized protein C7orf31
PLRG1	Pleiotropic regulator 1
ZKSCAN7	Zinc finger protein with KRAB and SCAN domains 7
CCDC113	Coiled-coil domain-containing protein 113
ITGB3BP	Centromere protein R
FOXK1	Forkhead box protein K1
G3BP2	Ras GTPase-activating protein-binding protein 2
ORC1	Origin recognition complex subunit 1
KMT2C	Histone-lysine N-methyltransferase 2C
MTFR1L	Mitochondrial fission regulator 1-like
EIF3L	Eukaryotic translation initiation factor 3 subunit L
MYH9	Myosin-9
RAN	GTP-binding nuclear protein Ran
ETFB	Electron transfer flavoprotein subunit beta
DNMT3A	DNA (cytosine-5)-methyltransferase 3A
ZNF175	Zinc finger protein 175
PHF2	Lysine-specific demethylase PHF2
GMEB1	Glucocorticoid modulatory element-binding protein 1
ACTA1;ACTC1;ACTG2;ACTA2	Actin, alpha skeletal muscle;Actin, alpha cardiac muscle 1;Actin, gamma-enteric smooth muscle;Actin, aortic smooth muscle
PSMA2	Proteasome subunit alpha type;Proteasome subunit alpha type-2
PMS1	PMS1 protein homolog 1
LTV1	Protein LTV1 homolog
ERH	Enhancer of rudimentary homolog
MYOCD	Myocardin
DNA2	DNA replication ATP-dependent helicase/nuclease DNA2;DNA replication nuclease DNA2;DNA replication ATP-dependent helicase DNA2
JUND	Transcription factor jun-D
NFKB1	Nuclear factor NF-kappa-B p105 subunit;Nuclear factor NF-kappa-B p50 subunit
NUF2	Kinetochore protein Nuf2
ZNF799	Zinc finger protein 799
EIF3D	Eukaryotic translation initiation factor 3 subunit D
HMGXB3	HMG domain-containing protein 3
NUAK1	NUAK family SNF1-like kinase 1
AKAP8L	A-kinase anchor protein 8-like
HIST1H2BD	Histone H2B type 1-D
PSM8;PSMB8	Proteasome subunit beta type;Proteasome subunit beta type-8
DTL	Denticleless protein homolog
UFD1L	Ubiquitin fusion degradation protein 1 homolog
MISP	Mitotic interactor and substrate of PLK1
KLHL11	Kelch-like protein 11
ZNF92	Zinc finger protein 92
CKB	Creatine kinase B-type
ZBTB12	Zinc finger and BTB domain-containing protein 12
ANKRD1	Ankyrin repeat domain-containing protein 1
ZNF502	Zinc finger protein 502
ZFP28	Zinc finger protein 28 homolog
BSG	Basigin
ELAC2	Zinc phosphodiesterase ELAC protein 2
C12orf29	Uncharacterized protein C12orf29
ZNF37A	Zinc finger protein 37A
PLK1	Serine/threonine-protein kinase PLK1
HIST1H2BH	Histone H2B type 1-H
HDAC5	Histone deacetylase 5
ZNF275	Zinc finger protein 275
ERCC5	DNA repair protein complementing XP-G cells
FIZ1	Flt3-interacting zinc finger protein 1
ZFYVE19	Abscission/NoCut checkpoint regulator
MTL5	Tesmin
PHF11	PHD finger protein 11
HR	Lysine-specific demethylase hairless
FRMD6	FERM domain-containing protein 6
CCDC121	Coiled-coil domain-containing protein 121
GABPB2	GA-binding protein subunit beta-2
POLA1	DNA polymerase;DNA polymerase alpha catalytic subunit
MTUS1	Microtubule-associated tumor suppressor 1
RBMXL1	RNA binding motif protein, X-linked-like-1
SH2D4A	SH2 domain-containing protein 4A
PHF23	PHD finger protein 23
DOK1	Docking protein 1
WDR36	WD repeat-containing protein 36
TCEB1	Transcription elongation factor B polypeptide 1
DNTTIP1	Deoxynucleotidyltransferase terminal-interacting protein 1
ZSCAN30	Zinc finger and SCAN domain-containing protein 30
ARHGAP11A	Rho GTPase-activating protein 11A
EBF1	Transcription factor COE1
ZNF248	Zinc finger protein 248
AES	Amino-terminal enhancer of split
CXorf67	Uncharacterized protein CXorf67
THOC3	THO complex subunit 3
DHX40	Probable ATP-dependent RNA helicase DHX40
DIS3	Exosome complex exonuclease RRP44
DMRTA1	Doublesex- and mab-3-related transcription factor A1
FSBP	Fibrinogen silencer-binding protein
NR2C2	Nuclear receptor subfamily 2 group C member 2
RXRB	Retinoic acid receptor RXR-beta
MCRS1	Microspherule protein 1
PRDM10	PR domain zinc finger protein 10
GUCY1A2	Guanylate cyclase soluble subunit alpha-2
PRKCDBP	Protein kinase C delta-binding protein
PELO	Protein pelota homolog
RUNX2	Runt-related transcription factor 2
E4F1	Transcription factor E4F1
THAP5	THAP domain-containing protein 5
ZNF264	Zinc finger protein 264
SNX3	Sorting nexin-3
RPS13	40S ribosomal protein S13
ZNF587	Zinc finger protein 587
CYCS	Cytochrome c
TXN	Thioredoxin
CAAP1	Caspase activity and apoptosis inhibitor 1
MYDGF	Myeloid-derived growth factor
TSEN34	tRNA-splicing endonuclease subunit Sen34
RYBP	RING1 and YY1-binding protein
TRMT1L	TRMT1-like protein
DBF4B	Protein DBF4 homolog B
PHLDA1	Pleckstrin homology-like domain family A member 1
ZNF79	Zinc finger protein 79
DDIAS	DNA damage-induced apoptosis suppressor protein
AHSA1	Activator of 90 kDa heat shock protein ATPase homolog 1
EIF3H	Eukaryotic translation initiation factor 3 subunit H
USP42	Ubiquitin carboxyl-terminal hydrolase 42
CEBPZ	CCAAT/enhancer-binding protein zeta
PYCR2	Pyrroline-5-carboxylate reductase 2;Pyrroline-5-carboxylate reductase
CTDSPL2	CTD small phosphatase-like protein 2
HBP1	HMG box-containing protein 1
SARS	Serine--tRNA ligase, cytoplasmic
LOC102724428;SIK1	Serine/threonine-protein kinase SIK1
MYNN	Myoneurin
GPATCH4	G patch domain-containing protein 4
ZNF569	Zinc finger protein 569
ZNF324	Zinc finger protein 324A
ZNF772	Zinc finger protein 772
TADA2L;TADA2A	Transcriptional adapter 2-alpha
RPL27A	60S ribosomal protein L27a
EIF4B	Eukaryotic translation initiation factor 4B
UTP15	U3 small nucleolar RNA-associated protein 15 homolog
TCF4	Transcription factor 4
CRABP2	Cellular retinoic acid-binding protein 2
SGOL2	Shugoshin-like 2
PRKAA1	5-AMP-activated protein kinase catalytic subunit alpha-1
PSMC4	26S protease regulatory subunit 6B
ZNF888	Zinc finger protein 888
MUM1L1	PWWP domain-containing protein MUM1L1
ZMYM6	Zinc finger MYM-type protein 6
EIF5	Eukaryotic translation initiation factor 5
CAMK2G;CAMK2B;CAMK2D	Calcium/calmodulin-dependent protein kinase type II subunit gamma;Calcium/calmodulin-dependent protein kinase type II subunit beta;Calcium/calmodulin-dependent protein kinase type II subunit delta
ETF1	Eukaryotic peptide chain release factor subunit 1
IGF2BP1	Insulin-like growth factor 2 mRNA-binding protein 1
EIF2S1	Eukaryotic translation initiation factor 2 subunit 1
TAGLN2	Transgelin-2
NKX3-1	Homeobox protein Nkx-3.1
RPS23	40S ribosomal protein S23
FAM178A	Protein FAM178A
ETS2	Protein C-ets-2
PLA2G4A	Cytosolic phospholipase A2;Phospholipase A2;Lysophospholipase
BAZ2B	Bromodomain adjacent to zinc finger domain protein 2B
GLIS3	Zinc finger protein GLIS3
GNB5	Guanine nucleotide-binding protein subunit beta-5
SPIDR	DNA repair-scaffolding protein
ZNF26	Zinc finger protein 26
TFE3	Transcription factor E3
RGS12	Regulator of G-protein signaling 12
JADE3	Protein Jade-3
IGF1R	Tyrosine-protein kinase receptor;Insulin-like growth factor 1 receptor;Insulin-like growth factor 1 receptor alpha chain;Insulin-like growth factor 1 receptor beta chain
PBK	Lymphokine-activated killer T-cell-originated protein kinase
THOC5	THO complex subunit 5 homolog
RHOBTB2	Rho-related BTB domain-containing protein 2
CSRNP1	Cysteine/serine-rich nuclear protein 1
N4BP2L2	NEDD4-binding protein 2-like 2
EIF3I	Eukaryotic translation initiation factor 3 subunit I
APTX	Aprataxin
ZNF333	Zinc finger protein 333
SIK3	Serine/threonine-protein kinase SIK3
TAF7	Transcription initiation factor TFIID subunit 7
DYNC1H1	Cytoplasmic dynein 1 heavy chain 1
AKT1	RAC-alpha serine/threonine-protein kinase
ZFC3H1	Zinc finger C3H1 domain-containing protein
DDB2	DNA damage-binding protein 2
LAMC1	Laminin subunit gamma-1
ZNF605	Zinc finger protein 605
ZNF212	Zinc finger protein 212
RNF4	E3 ubiquitin-protein ligase RNF4
HARS	Histidine--tRNA ligase, cytoplasmic
EEF1G	Elongation factor 1-gamma
DUSP10	Dual specificity protein phosphatase 10
ARID3B	AT-rich interactive domain-containing protein 3B
TBX1	T-box transcription factor TBX1
MAPKAPK2	MAP kinase-activated protein kinase 2
NQO1	NAD(P)H dehydrogenase [quinone] 1
NR3C2	Mineralocorticoid receptor
TTC33	Tetratricopeptide repeat protein 33
PLEK2	Pleckstrin-2
KDM4B	Lysine-specific demethylase 4B
SMC1A	Structural maintenance of chromosomes protein;Structural maintenance of chromosomes protein 1A
REXO1	RNA exonuclease 1 homolog
PPIE	Peptidyl-prolyl cis-trans isomerase E;Peptidyl-prolyl cis-trans isomerase
LRRC41	Leucine-rich repeat-containing protein 41
UBXN6	UBX domain-containing protein 6
PSMC5	26S protease regulatory subunit 8
ESF1	ESF1 homolog
POLR2A	DNA-directed RNA polymerase;DNA-directed RNA polymerase II subunit RPB1
P4HA1	Prolyl 4-hydroxylase subunit alpha-1
APMAP	Adipocyte plasma membrane-associated protein
WTAP	Pre-mRNA-splicing regulator WTAP
ESCO2	N-acetyltransferase ESCO2
TRIM37	E3 ubiquitin-protein ligase TRIM37
NAP1L3	Nucleosome assembly protein 1-like 3
CENPU;MLF1IP	Centromere protein U
ZNF507	Zinc finger protein 507
PCYT1A	Choline-phosphate cytidylyltransferase A
RBM7	RNA-binding protein 7
PLEKHA2	Pleckstrin homology domain-containing family A member 2
PRKCSH	Glucosidase 2 subunit beta
CHTOP	Chromatin target of PRMT1 protein
ZNF829	Zinc finger protein 829
STOX2	Storkhead-box protein 2
TRIM6-TRIM34;TRIM6	Tripartite motif-containing protein 6
MBD4	Methyl-CpG-binding domain protein 4
CUL3	Cullin-3
CENPO	Centromere protein O
PDIA3	Protein disulfide-isomerase A3
ITGB1	Integrin beta-1
GLE1	Nucleoporin GLE1
ZC3H3	Zinc finger CCCH domain-containing protein 3
HNRNPH3	Heterogeneous nuclear ribonucleoprotein H3
IER2	Immediate early response gene 2 protein
PRPF4	U4/U6 small nuclear ribonucleoprotein Prp4
SHMT1	Serine hydroxymethyltransferase, cytosolic
ZNF701	Zinc finger protein 701
CCT4	T-complex protein 1 subunit delta
INCENP	Inner centromere protein
ZNF652	Zinc finger and BTB domain-containing protein 47;Zinc finger protein 652
SH3PXD2B	SH3 and PX domain-containing protein 2B
CINP	Cyclin-dependent kinase 2-interacting protein
MAZ	Myc-associated zinc finger protein
POLR1A	DNA-directed RNA polymerase I subunit RPA1;DNA-directed RNA polymerase
DVL3	Segment polarity protein dishevelled homolog DVL-3
SUB1	Activated RNA polymerase II transcriptional coactivator p15
HELLS	Lymphoid-specific helicase
VRK2	Serine/threonine-protein kinase VRK2
ZNF18	Zinc finger protein 18
SPATA6	Spermatogenesis-associated protein 6
ELK1	ETS domain-containing protein Elk-1
PSMC2	26S protease regulatory subunit 7
CAPZA2	F-actin-capping protein subunit alpha-2
NOL10	Nucleolar protein 10
TNNT1	Troponin T, slow skeletal muscle
RIF1	Telomere-associated protein RIF1
ERBB2IP	Protein LAP2
BACH1	Transcription regulator protein BACH1
LAMA1	Laminin subunit alpha-1
STXBP4	Syntaxin-binding protein 4
UBN1	Ubinuclein-1
TIGD1	Tigger transposable element-derived protein 1
POLD2	DNA polymerase delta subunit 2
LSM4	U6 snRNA-associated Sm-like protein LSm4
SREK1	Splicing regulatory glutamine/lysine-rich protein 1
PEG3	Paternally-expressed gene 3 protein
POLB	DNA polymerase beta
IDI1	Isopentenyl-diphosphate Delta-isomerase 1
UBXN1	UBX domain-containing protein 1
CD2BP2	CD2 antigen cytoplasmic tail-binding protein 2
CSDE1	Cold shock domain-containing protein E1
BEND5	BEN domain-containing protein 5
ANKRD11	Ankyrin repeat domain-containing protein 11
NUDT5	ADP-sugar pyrophosphatase
CBS	Cystathionine beta-synthase
TTK	Dual specificity protein kinase TTK
EAF1	ELL-associated factor 1
EEF1D	Elongation factor 1-delta
CANX	Calnexin
FANCL	E3 ubiquitin-protein ligase FANCL
POLA2	DNA polymerase alpha subunit B
UBTF	Nucleolar transcription factor 1
KIF20A	Kinesin-like protein KIF20A
RPS16	40S ribosomal protein S16
MYH1	Myosin-1
RELL1	RELT-like protein 1
MB21D1	Cyclic GMP-AMP synthase
POLR2B	DNA-directed RNA polymerase;DNA-directed RNA polymerase II subunit RPB2
PPM1G	Protein phosphatase 1G
MAP7D3	MAP7 domain-containing protein 3
SDF2L1	Stromal cell-derived factor 2-like protein 1
THUMPD2	THUMP domain-containing protein 2
ZNF232	Zinc finger protein 232
NAA10	N-alpha-acetyltransferase 10
ZNF383	Zinc finger protein 383
USP37	Ubiquitin carboxyl-terminal hydrolase 37
ZGPAT	Zinc finger CCCH-type with G patch domain-containing protein
HMGCS1	Hydroxymethylglutaryl-CoA synthase, cytoplasmic
SMYD3	Histone-lysine N-methyltransferase SMYD3
NOSIP	Nitric oxide synthase-interacting protein
KRT34	Keratin, type I cuticular Ha4
PAICS	Multifunctional protein ADE2;Phosphoribosylaminoimidazole-succinocarboxamide synthase;Phosphoribosylaminoimidazole carboxylase
SET	Protein SET
FAM111B	Protein FAM111B
DDX43	Probable ATP-dependent RNA helicase DDX43
DDX52	Probable ATP-dependent RNA helicase DDX52
DTX3L	E3 ubiquitin-protein ligase DTX3L
ZNF699	Zinc finger protein 699
KDM4C	Lysine-specific demethylase 4C
RPS10;RPS10-NUDT3;RPS10P5	40S ribosomal protein S10;Putative 40S ribosomal protein S10-like
ZNF14	Zinc finger protein 14
BMP1	Bone morphogenetic protein 1
UBR5	E3 ubiquitin-protein ligase UBR5
PARP2	Poly [ADP-ribose] polymerase 2
LSM14B	Protein LSM14 homolog B
IGFBP5	Insulin-like growth factor-binding protein 5
KDM1B	Lysine-specific histone demethylase 1B
ADK	Adenosine kinase
ATP1B3	Sodium/potassium-transporting ATPase subunit beta-3
ITGAV	Integrin alpha-V;Integrin alpha-V heavy chain;Integrin alpha-V light chain
TFIP11	Tuftelin-interacting protein 11
FABP5	Fatty acid-binding protein, epidermal
HIST1H1C;HIST1H1E;HIST1H1D;HIST1H1A	Histone H1.2;Histone H1.4;Histone H1.3;Histone H1.1
RNGTT	mRNA-capping enzyme;Polynucleotide 5-triphosphatase;mRNA guanylyltransferase
ZNF221	Zinc finger protein 221
CTPS1	CTP synthase 1
FAM60A	Protein FAM60A
NELFA	Negative elongation factor A
RIN2	Ras and Rab interactor 2
KIF11	Kinesin-like protein KIF11
INO80B-WBP1;INO80B	INO80 complex subunit B
LTBP3	Latent-transforming growth factor beta-binding protein 3
LARS	Leucine--tRNA ligase, cytoplasmic
FARSA	Phenylalanine--tRNA ligase alpha subunit
PARP8	Poly [ADP-ribose] polymerase 8
DDX56	Probable ATP-dependent RNA helicase DDX56
RPL38	60S ribosomal protein L38
NUAK2	NUAK family SNF1-like kinase 2
ATRIP	ATR-interacting protein
TOPBP1	DNA topoisomerase 2-binding protein 1
NAE1	NEDD8-activating enzyme E1 regulatory subunit
ZNF300	Zinc finger protein 300
BRCC3	Lys-63-specific deubiquitinase BRCC36
ZNF423	Zinc finger protein 423
BCL6	B-cell lymphoma 6 protein
JARID2	Protein Jumonji
BRF1	Transcription factor IIIB 90 kDa subunit
METTL3	N6-adenosine-methyltransferase 70 kDa subunit
CKAP2	Cytoskeleton-associated protein 2
CFAP36	Cilia- and flagella-associated protein 36
RRP8	Ribosomal RNA-processing protein 8
TAF10	Transcription initiation factor TFIID subunit 10
ACTR5	Actin-related protein 5
ZNF568	Zinc finger protein 568
MAGEF1	Melanoma-associated antigen F1
RTCB	tRNA-splicing ligase RtcB homolog
FAN1	Fanconi-associated nuclease 1
CDK9	Cyclin-dependent kinase 9
ELAVL1	ELAV-like protein 1
ASS1	Argininosuccinate synthase
GSTM3	Glutathione S-transferase Mu 3
NFX1	Transcriptional repressor NF-X1
PIR	Pirin
DKFZp781D1416;STAG1	Cohesin subunit SA-1
ARMCX1	Armadillo repeat-containing X-linked protein 1
FAT1	Protocadherin Fat 1;Protocadherin Fat 1, nuclear form
TCEB3	Transcription elongation factor B polypeptide 3
RFWD3	E3 ubiquitin-protein ligase RFWD3
PON2	Serum paraoxonase/arylesterase 2
GPS1	COP9 signalosome complex subunit 1
MUM1	PWWP domain-containing protein MUM1
GRWD1	Glutamate-rich WD repeat-containing protein 1
SPDL1	Protein Spindly
PSMA7	Proteasome subunit alpha type-7
NET1	Neuroepithelial cell-transforming gene 1 protein
MKS1	Meckel syndrome type 1 protein
PMF1;PMF1-BGLAP	Polyamine-modulated factor 1
RPS6KA3	Ribosomal protein S6 kinase alpha-3
SUGT1	Suppressor of G2 allele of SKP1 homolog
CUEDC2	CUE domain-containing protein 2
NOC3L	Nucleolar complex protein 3 homolog
TTN	Titin
CAT	Catalase
C17orf53	Uncharacterized protein C17orf53
ZNF780B	Zinc finger protein 780B
NES	Nestin
RCC1	Regulator of chromosome condensation
BAG3	BAG family molecular chaperone regulator 3
IP6K2	Inositol hexakisphosphate kinase 2
PFN1	Profilin-1
KRT73	Keratin, type II cytoskeletal 73
NADK	NAD kinase
WDR1	WD repeat-containing protein 1
HMG20A	High mobility group protein 20A
LARP4	La-related protein 4
MCPH1	Microcephalin
CMSS1	Protein CMSS1
DPF3	Zinc finger protein DPF3
CCDC97	Coiled-coil domain-containing protein 97
CDT1	DNA replication factor Cdt1
ZNF485	Zinc finger protein 485
ABT1	Activator of basal transcription 1
ACBD6	Acyl-CoA-binding domain-containing protein 6
CPSF7	Cleavage and polyadenylation specificity factor subunit 7
DDX20	Probable ATP-dependent RNA helicase DDX20
RPS6	40S ribosomal protein S6
CEP72	Centrosomal protein of 72 kDa
SENP1	Sentrin-specific protease 1
LTBP4	Latent-transforming growth factor beta-binding protein 4
VPS26A	Vacuolar protein sorting-associated protein 26A
LAMB2	Laminin subunit beta-2
ZNF684	Zinc finger protein 684
MFI2	Melanotransferrin
MAPKAPK3	MAP kinase-activated protein kinase 3
CREM	cAMP-responsive element modulator
RPL27	60S ribosomal protein L27
CEP44	Centrosomal protein of 44 kDa
RBM43	RNA-binding protein 43
TRMT5	tRNA (guanine(37)-N1)-methyltransferase
LAMC2	Laminin subunit gamma-2
THYN1	Thymocyte nuclear protein 1
TRMT6	tRNA (adenine(58)-N(1))-methyltransferase non-catalytic subunit TRM6
ZNF675	Zinc finger protein 675
WAPAL	Wings apart-like protein homolog
PTER	Phosphotriesterase-related protein
CXorf57	Uncharacterized protein CXorf57
ERGIC3	Endoplasmic reticulum-Golgi intermediate compartment protein 3
ENY2	Transcription and mRNA export factor ENY2
FBXO38	F-box only protein 38
NARFL	Cytosolic Fe-S cluster assembly factor NARFL
ZNF780A	Zinc finger protein 780A
RABGEF1	Rab5 GDP/GTP exchange factor
ZNF140	Zinc finger protein 140
EPAS1	Endothelial PAS domain-containing protein 1
FSCN1	Fascin
LRP1	Prolow-density lipoprotein receptor-related protein 1;Low-density lipoprotein receptor-related protein 1 85 kDa subunit;Low-density lipoprotein receptor-related protein 1 515 kDa subunit;Low-density lipoprotein receptor-related protein 1 intracellular domain
MYBBP1A	Myb-binding protein 1A
STAMBP	STAM-binding protein
KHDRBS3	KH domain-containing, RNA-binding, signal transduction-associated protein 3
CDK4	Cyclin-dependent kinase 4
CREB1	Cyclic AMP-responsive element-binding protein 1
TP53	Cellular tumor antigen p53
ZRANB3	DNA annealing helicase and endonuclease ZRANB3;DNA annealing helicase ZRANB3;Endonuclease ZRANB3
MLST8	Target of rapamycin complex subunit LST8
MSTO1	Protein misato homolog 1
ZNF256	Zinc finger protein 256
FZR1	Fizzy-related protein homolog
CFH	Complement factor H
AXIN2	Axin-2
MNAT1	CDK-activating kinase assembly factor MAT1
SEPT10	Septin-10
WBP5	WW domain-binding protein 5
DHX36	ATP-dependent RNA helicase DHX36
ZFPM1	Zinc finger protein ZFPM1
UBQLN1;UBQLN2	Ubiquilin-1;Ubiquilin-2
C1QBP	Complement component 1 Q subcomponent-binding protein, mitochondrial
RECQL4	ATP-dependent DNA helicase Q4
MTO1	Protein MTO1 homolog, mitochondrial
SIN3B	Paired amphipathic helix protein Sin3b
FAM172A	Protein FAM172A
ZNF155	Zinc finger protein 155
DNAJA1	DnaJ homolog subfamily A member 1
AKIRIN2	Akirin-2
FAM83G	Protein FAM83G
KIF5B	Kinesin-1 heavy chain
GLTSCR2	Glioma tumor suppressor candidate region gene 2 protein
MARK4	MAP/microtubule affinity-regulating kinase 4
ANXA6	Annexin A6;Annexin
ACTR8	Actin-related protein 8
NFYC	Nuclear transcription factor Y subunit gamma
OGFR	Opioid growth factor receptor
C20orf96	Uncharacterized protein C20orf96
TAF5	Transcription initiation factor TFIID subunit 5
GAR1	H/ACA ribonucleoprotein complex subunit 1
HIST1H2BL	Histone H2B type 1-L
ERCC6L2	DNA excision repair protein ERCC-6-like 2
SOX17	Transcription factor SOX-17
PSMC3	26S protease regulatory subunit 6A
TLE3	Transducin-like enhancer protein 3
ZNF585A	Zinc finger protein 585A
SENP5	Sentrin-specific protease 5
CDC45	Cell division control protein 45 homolog
ZNF606	Zinc finger protein 606
HIF1A	Hypoxia-inducible factor 1-alpha
TAF1D	TATA box-binding protein-associated factor RNA polymerase I subunit D
PRC1	Protein regulator of cytokinesis 1
RNF187	E3 ubiquitin-protein ligase RNF187
RTKN2	Rhotekin-2
44M2.3	Putative RNA exonuclease NEF-sp
CDC6	Cell division control protein 6 homolog
SUPT20H	Transcription factor SPT20 homolog
STK33	Serine/threonine-protein kinase 33
HAUS1	HAUS augmin-like complex subunit 1
CYC1	Cytochrome c1, heme protein, mitochondrial
IFT57	Intraflagellar transport protein 57 homolog
ANXA4	Annexin;Annexin A4
EDC3	Enhancer of mRNA-decapping protein 3
NARF	Nuclear prelamin A recognition factor
BLZF1	Golgin-45
NPM3	Nucleoplasmin-3
SAE1	SUMO-activating enzyme subunit 1;SUMO-activating enzyme subunit 1, N-terminally processed
CSRNP2	Cysteine/serine-rich nuclear protein 2
HELZ	Probable helicase with zinc finger domain
SRSF9	Serine/arginine-rich splicing factor 9
IQCA1	IQ and AAA domain-containing protein 1
COPA	Coatomer subunit alpha;Xenin;Proxenin
ABLIM1	Actin-binding LIM protein 1
SERPINH1	Serpin H1
HSPA6	Heat shock 70 kDa protein 6
ZNF570	Zinc finger protein 570
GTF3C5	General transcription factor 3C polypeptide 5
NSA2	Ribosome biogenesis protein NSA2 homolog
PLAGL2	Zinc finger protein PLAGL2
mkl1;MKL1	MKL/myocardin-like protein 1
GANAB	Neutral alpha-glucosidase AB
CTNNB1	Catenin beta-1
JRK	Jerky protein homolog
OGFOD1	Prolyl 3-hydroxylase OGFOD1
PARK7	Protein deglycase DJ-1
GLTSCR1	Glioma tumor suppressor candidate region gene 1 protein
RAD54B	DNA repair and recombination protein RAD54B
ARPC3	Actin-related protein 2/3 complex subunit 3
RBM12	RNA-binding protein 12
DHX37	Probable ATP-dependent RNA helicase DHX37
COPB1	Coatomer subunit beta
TAF12	Transcription initiation factor TFIID subunit 12
PITPNB	Phosphatidylinositol transfer protein beta isoform
MRPS31	28S ribosomal protein S31, mitochondrial
WDR76	WD repeat-containing protein 76
GRK6	G protein-coupled receptor kinase 6
PPP1CA	Serine/threonine-protein phosphatase PP1-alpha catalytic subunit;Serine/threonine-protein phosphatase
CCDC84	Coiled-coil domain-containing protein 84
UHRF2	E3 ubiquitin-protein ligase UHRF2
GPATCH1	G patch domain-containing protein 1
ZNF710	Zinc finger protein 710 (Fragment)
TUFT1	Tuftelin
G6PD	Glucose-6-phosphate 1-dehydrogenase
ZNF814	Putative uncharacterized zinc finger protein 814
NSMF	NMDA receptor synaptonuclear signaling and neuronal migration factor
KIAA0586	Protein TALPID3
TSEN2	tRNA-splicing endonuclease subunit Sen2
MFF	Mitochondrial fission factor
IFT52	Intraflagellar transport protein 52 homolog
CEP126	Centrosomal protein of 126 kDa
ZNF618	Zinc finger protein 618 (Fragment)
TATDN2	Putative deoxyribonuclease TATDN2
UBE2T	Ubiquitin-conjugating enzyme E2 T
TRUB1	Probable tRNA pseudouridine synthase 1
KIF2C	Kinesin-like protein KIF2C
AUNIP	Aurora kinase A and ninein-interacting protein
BUB3	Mitotic checkpoint protein BUB3
RPL13A;RPL13a	60S ribosomal protein L13a
RCOR3	REST corepressor 3
CEP295	Centrosomal protein of 295 kDa
EIF4ENIF1	Eukaryotic translation initiation factor 4E transporter
TNFAIP1	BTB/POZ domain-containing adapter for CUL3-mediated RhoA degradation protein 2
NCOA4	Nuclear receptor coactivator 4
TRIB2	Tribbles homolog 2
ZNF517	Zinc finger protein 517
RTEL1;RTEL1-TNFRSF6B	Regulator of telomere elongation helicase 1
ZGRF1	Protein ZGRF1
SH3RF2	Putative E3 ubiquitin-protein ligase SH3RF2
ZNF10	Zinc finger protein 10
CPSF3L	Integrator complex subunit 11
ZNF410	Zinc finger protein 410
PDLIM7	PDZ and LIM domain protein 7
THAP10	THAP domain-containing protein 10
[truncated: 4,532 more rows]
